# Supplementary material
Source: publisher figshare collection journal article supplement (https://acs.figshare.com/ndownloader/files/4592686)

**Supporting information:**

**Oxidative Conversion of  $\alpha,\alpha$ -Disubstituted Acetamides to Corresponding One Carbon Shorter Ketones Using Hypervalent Iodine ( $\lambda^5$ ) Reagents in Combination With Tetraethylammonium Bromide**

*Eknath V. Bellale, Dinesh S. Bhalerao and Krishnacharya G. Akamanchi\**

| Sr. No. | Content                                                                  | Page No. |
|---------|--------------------------------------------------------------------------|----------|
| 1       | General Methods                                                          | S2       |
| 2       | Spectral Data                                                            | S3-S6    |
| 3       | Preparation & Spectral Data of $\alpha,\alpha$ -Disubstituted Acetamides | S7-S12   |
| 4       | References                                                               | S12-S13  |
| 5       | $^1\text{H}$ NMR & $^{13}\text{C}$ NMR Spectra of New Compounds          | S13-S21  |
| 6       | $^1\text{H}$ NMR Spectra & HPLC Chromatogram of Ketones(2a-2k)           | S22-S35  |

#### General Methods:

All  $^1\text{H}$  NMR and  $^{13}\text{C}$  NMR spectra were recorded on 60MHz or 300 MHz. Chemical shift values are expressed in  $\delta$  units relative to tetramethylsilane (TMS) signal as internal reference in  $\text{CCl}_4$  or  $\text{CDCl}_3$ . IR spectra were recorded neat or as KBr pallet. All the solvents were purchased from commercial sources and used without further purification. Wherever necessary the solvents were dried by standard literature procedures. Gas chromatography (GC) is used with packed column 5% OV-17, carrier gas  $\text{N}_2$ , flow rate  $2.6 \text{ cm}^3/\text{min}$ , Injector Temperature  $300^\circ\text{C}$ , FID detector. High Performance Liquid Chromatography (HPLC) is used with Column RP-18e ( $5\mu\text{m}$ ), with UV detector, flow rate  $1\text{ml}/\text{min}$ .

#### General experimental procedure for conversion of $\alpha,\alpha$ -disubstituted acetamides to ketones:

To a stirred suspension of 10 mmol of hypervalent iodine ( $\lambda^5$ ) reagent in 30 ml of  $\text{CH}_3\text{CN}$  was added 5 mmol TEAB and stirred for 5 min, a yellow suspension was observed. To which was added  $\alpha,\alpha$ -disubstituted acetamide (5 mmol) in one portion at RT. The temperature of the reaction mixture was raised to  $60^\circ\text{C}$  and stirred until complete consumption of starting material as observed by TLC. Acetonitrile was removed under reduced pressure and resultant residue was suspended in 30 ml of chloroform, stirred and filtered. The filtrate was washed with 30 ml of 10% sodium bisulfite solution, 30 ml of saturated sodium carbonate solution and 30 ml of brine. The organic layer was dried over anhydrous sodium sulfate and concentrated to give crude ketone. Pure ketone was isolated after silica gel column chromatography (ethyl acetate: hexane = 5: 95)

### Spectral Data:

IR and NMR data were identical with those of authentic sample and data are given below: -

#### Benzophenone 2a

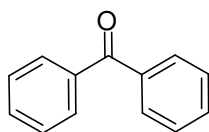

White solid, mp 47-48 °C (lit.<sup>1</sup> mp 47.5 °C), <sup>1</sup>H NMR (300 MHz, CDCl<sub>3</sub>): δ 7.80-7.78(d, *J* = 7.8Hz, 4H), 7.59-7.54(t, *J* = 7.35Hz, 2H) 7.49-7.44(t, *J* = 7.5Hz, 4H) ppm. IR (KBr) ν<sub>max</sub>: 3060, 3030 and 1659 cm<sup>-1</sup>.

#### 1-(4-Chlorophenyl)pentan-1-one 2b

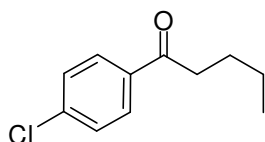

Colorless liquid, (lit.<sup>2</sup> bp 126-129 °C). <sup>1</sup>H NMR (60 MHz, CCl<sub>4</sub>): δ 1.82-0.96(m, 7H), 2.86(t, *J* = 6.6 Hz, 2H), 7.36(d, *J* = 9Hz, 2H), 7.86(d, *J* = 9Hz, 2H,) ppm. IR (neat) ν<sub>max</sub>: 2959, 1688, 1590, 1400 and 1092 cm<sup>-1</sup>. HPLC Purity: 99.94 %

#### 1-(4-Isobutylphenyl)ethanone 2c

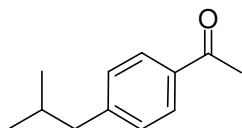

Colorless liquid, (lit.<sup>3</sup> bp<sub>1.5</sub> 94-100 °C), <sup>1</sup>H NMR (300 MHz, CDCl<sub>3</sub>): δ 7.89-7.86(d, *J* = 7.8Hz, 2H),

7.24-7.21(d,  $J = 7.8\text{Hz}$ , 2H), 2.58(s, 3H), 2.54-2.52(d,  $J = 7.2\text{Hz}$ , 2H), 1.96-1.81(m, 1H), 0.92-0.89(d,  $J = 6.6\text{Hz}$ , 6H) ppm. IR (KBr)  $\nu_{\text{max}}$ : 3031, 2956, 2925, 1683 and  $796\text{ cm}^{-1}$ .

### Butyrophenone 2d

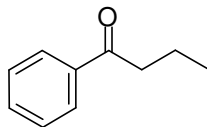

Colorless liquid, (lit.<sup>1</sup> bp  $228\text{ }^{\circ}\text{C}$ ),  $^1\text{H}$  NMR (300 MHz,  $\text{CDCl}_3$ ):  $\delta$  7.95-7.92(d,  $J = 7.5\text{Hz}$ , 2H), 7.54-7.49(t,  $J = 7.05\text{Hz}$ , 1H), 7.45-7.40(t,  $J = 7.35\text{Hz}$ , 2H), 2.94-2.89(t,  $J = 7.2\text{Hz}$ , 2H), 1.81-1.68(m, 2H), 1.00-0.95(t,  $J = 7.35\text{Hz}$ , 3H)ppm. IR (neat)  $\nu_{\text{max}}$ : 1684, 1599, 1583, 1492, 761 and  $691\text{ cm}^{-1}$ .

### Acetophenone 2e

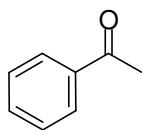

Colorless liquid, (lit.<sup>1</sup> bp  $202\text{ }^{\circ}\text{C}$ ),  $^1\text{H}$  NMR (300 MHz,  $\text{CDCl}_3$ ):  $\delta$  7.94-7.92(d,  $J = 7.8\text{Hz}$ , 2H), 7.56-7.51(t,  $J = 7.35\text{Hz}$ , 1H), 7.45-7.40(t,  $J = 7.5\text{Hz}$ , 2H), 2.57(s, 3H) ppm. IR (KBr)  $\nu_{\text{max}}$ : 1683, 1490, 3066, 3031 and  $1691\text{ cm}^{-1}$ .

### 1-(2-Fluorobiphenyl-4-yl)ethanone 2f

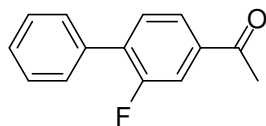

Solid, mp  $94\text{-}95\text{ }^{\circ}\text{C}$ , (lit.<sup>4</sup> mp  $97\text{ }^{\circ}\text{C}$ ),  $^1\text{H}$  NMR (300 MHz,  $\text{CDCl}_3$ ):  $\delta$  7.82-7.72(m, 2H), 7.59-7.42(m, 6H), 2.63(s, 3H) ppm. IR (KBr)  $\nu_{\text{max}}$ : 1686, 1646, 1599, 1583, 1492, 761 and  $691\text{ cm}^{-1}$ .

### 4-Oxo-2-phenylpentanenitrile 2g

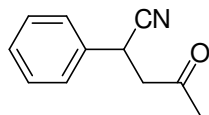

Colorless oil, (lit.<sup>5</sup> mp 47 °C), <sup>1</sup>H NMR (60 MHz, CCl<sub>4</sub>): δ 7.36-7.47(s, 5H), 4.35(t, J=7Hz, 1H), 3.22(dd, J=16Hz, 1H), 2.98(dd, J=7.16Hz, 1H), 2.18(s, 3H) ppm. IR (neat) ν<sub>max</sub>: 1584, 1491, 2236 and 1708 cm<sup>-1</sup>. HPLC Purity: 98.74 %

### 2-(2-Oxopropyl)cyclohexanone 2h

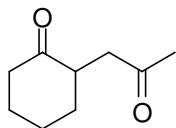

Colorless liquid, (lit.<sup>6</sup> bp 91-93 °C), <sup>1</sup>H NMR (60 MHz, CCl<sub>4</sub>): δ 2.170(s, 3H), 1.759(m, 5H), 1.2-0.92 (m, 6H) ppm. IR (KBr) ν<sub>max</sub>: 2956, 1710, 1696 and 1411 cm<sup>-1</sup>. HPLC Purity: 98.17 %

### Cyclohexanone 2i

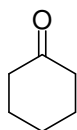

Colorless liquid, (lit.<sup>1</sup> bp 154-156 °C), <sup>1</sup>H NMR (300 MHz, CDCl<sub>3</sub>): δ 2.28-2.24(t, J = 6.6Hz, 4H), 1.83-1.75(m, 4H), 1.68-1.61(m, 2H) ppm. IR (neat) ν<sub>max</sub>: 2940, 2867 and 1717cm<sup>-1</sup>.

### 3-Heptanone 2j

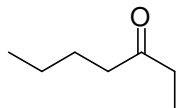

Colorless liquid, (lit.<sup>1</sup> bp 146-149 °C), <sup>1</sup>H NMR (300 MHz, CDCl<sub>3</sub>): δ 2.02-1.99(m, 4H), 1.73(m, 2H), 1.53(m, 2H), 1.08-0.83(m, 8H) ppm. IR (KBr) ν<sub>max</sub>: 2962, 2940, 2867 and 1716 cm<sup>-1</sup>.

### 1-(1-methyl-1H-pyrrol-2-yl)-2-phenylethanone 2k

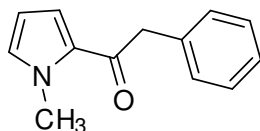

Oil, (lit.<sup>12</sup> oil), <sup>1</sup>H NMR (60 MHz, CDCl<sub>3</sub>): δ 3.95(s, 3H), 4.1(s, 2H), 6.67 (m, 2H), 6.22(m, 8H), 7.1(m, 1H), 7.4(m, 5H) ppm. IR (KBr) ν<sub>max</sub> : 3011, 2967, 1665 cm<sup>-1</sup>. HPLC Purity: 98.56 %

### N-Methyl Pyrrolidone 2l

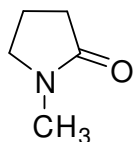

Colorless liquid, (lit.<sup>1</sup> bp 202 °C), <sup>1</sup>H NMR (300 MHz, CDCl<sub>3</sub>): δ 3.41-3.37(t, *J* = 8.1Hz, 2H), 2.85(s, 3H), 2.40-2.35(t, *J* = 6.9Hz, 2H), 2.08-1.98(m, 2H), ppm. IR (KBr) ν<sub>max</sub> : 2927, 2880, 1667 and 1603 cm<sup>-1</sup>.

### Cyclohexanone 2i (Reaction of isocyanate with IBX/TEAB)

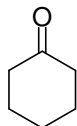

Colorless liquid, (lit.<sup>1</sup> bp 154-156 °C), <sup>1</sup>H NMR (300 MHz, CDCl<sub>3</sub>): δ 2.36-2.32(t, *J* = 6.6Hz, 4H), 1.91-1.83(m, 4H), 1.76-1.1.69(m, 2H) ppm. IR (neat) ν<sub>max</sub> : 2945, 2862 and 1716 cm<sup>-1</sup>.

### N-Bromo-1,1-diphenylmethanimine

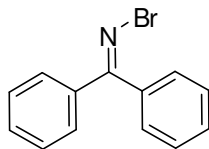

Colorless oil, (lit.<sup>7</sup> mp 37 °C), <sup>1</sup>H NMR (300 MHz, CDCl<sub>3</sub>): δ 7.84-7.81(d, *J* = 7.22Hz, 4H), 7.63-

7.58(t,  $J = 7.35\text{Hz}$ , 2H), 7.52-7.47(t,  $J = 7.5\text{Hz}$ , 4H) ppm. IR (neat)  $\nu_{\text{max}}$ : 3057, 1602, 1282, 842 and 692  $\text{cm}^{-1}$ . MS (EI):  $m/z$  262 & 260  $[\text{M}+\text{H}]^+$ , 182  $[(\text{Ph})_2\text{C}=\text{N}^+\text{H}.\text{H}]^+$ , 104 $[(\text{Ph})_2\text{C}=\text{NH}]^+$ .

## **Preparation of $\alpha,\alpha$ -disubstituted acetamides**

### **Method A: Alkylation of arylacetonitrile<sup>9</sup>**

To a stirred solution of 10 ml of 50% NaOH solution were added 30 mmol of arylacetonitrile and 10 mole% of benzyltriethylammonium chloride. By maintaining temperature at 30 °C, 30 mmol of alkyl bromide was added slowly and stirring continued for 2 h. Then temperature of the reaction mixture was increased to 40 °C and maintained for 30 min. The reaction mixture was diluted by addition of ethyl acetate 40 ml. Organic layer was separated, washed with 10% HCl (2 x 20 ml), water (2 x 20 ml), dried over sodium sulphate and concentrated to get crude product and was purified by silica gel column chromatography (ethyl acetate: hexane = 5: 95) afforded the pure product.

### **Method B: Hydrolysis of nitriles to carboxylic acids**

To a solution of NaOH (0.72 g, 18 mmol) in 20 ml of MeOH/Water (1:1) was added 15 mmol of nitrile and the mixture was refluxed for 12h. Methanol was removed under reduced pressure and residue was diluted with 10 ml ethyl acetate and 10 ml water. The aqueous layer was separated and acidified with 10% HCl solution to pH 2 and extracted with ethyl acetate (2 x 10 ml), organic layer washed with water (3 x 30 ml), dried over anhydrous sodium sulfate and concentrated to give crude acid. The crude acid was purified by silica gel column chromatography (ethyl acetate: hexane = 15: 85).

### **Method C: Amidation of carboxylic acid**

To a stirred thionyl chloride (15 mmol) was slowly added 10 mmol of acid and reaction mixture was warmed to 50 °C and maintained for 1 h. The reaction mixture was cooled to 10 °C in ice cold water and carefully, slowly 10 ml of 25% aq  $\text{NH}_3$  was added drop wise and stirred for 30 min. The solid

separated out was collected by filtration, washed with 10% NaHCO<sub>3</sub> solution and water. Dried and purified by crystallization.

#### Method D: Amidation of nitrile

To a stirred solution of (26 mmol) of nitrile in 40 ml of ethanol: water (9:1) was added (26 mmol) of KOH and refluxed for 12 h. Ethanol was distilled off and residue was extracted with ethyl acetate. Organic layer was washed with water (2 x 30 ml), dried over sodium sulphate and concentrated *in vacuo*. The residue was column chromatographed over silica gel (ethyl acetate: hexane = 20:80) to afford pure amide.

#### 2,2-Diphenylacetamide **1a**

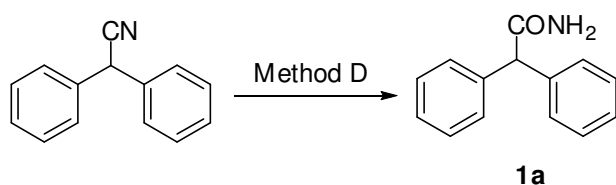

White solid. mp 169 °C (lit.<sup>1</sup> mp 167-168 °C), <sup>1</sup>H NMR (60 MHz, CCl<sub>4</sub>): δ 7.48-7.18(m, 10H), 5.615(s, 2H) ppm. IR (KBr) ν<sub>max</sub>: 3389, 3180, 1654, 1596 and 1494 cm<sup>-1</sup>.

#### 2-(4-Chlorophenyl)hexanamide **1b**

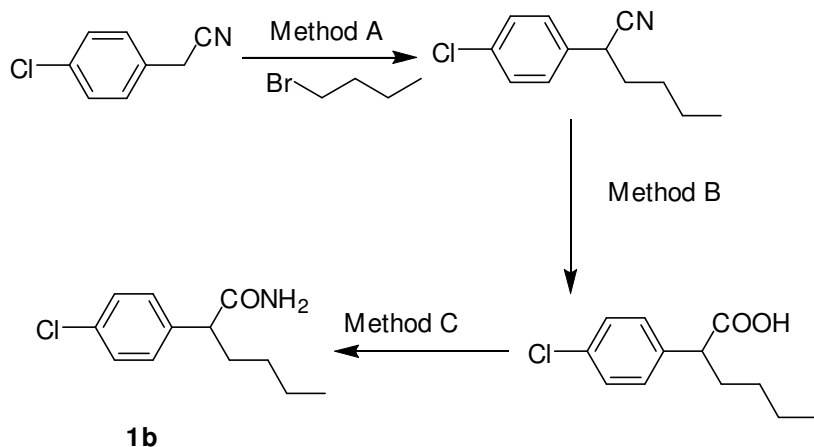

White Solid, mp 127-129 °C, <sup>1</sup>H NMR (300 MHz, CDCl<sub>3</sub>): δ 7.31-7.22(m, 4H), 5.63-5.39(bs, 2H),



3.35-3.29(t,  $J = 7.2$  Hz, 1H), 2.07(m, 1H), 1.71(m, 1H), 1.29-1.25(m, 4H), 0.87-0.83(t, 3H) ppm.  $^{13}\text{C}$  NMR (300 MHz,  $\text{CDCl}_3$ ): 175.6, 138.5, 133.2, 128.9, 129.3, 52.2, 32.9, 29.8, 22.4, 13.9 ppm. IR (KBr)  $\nu_{\text{max}}$ : 3385, 3190 and 1656  $\text{cm}^{-1}$ . Elemental analysis calcd for  $\text{C}_{12}\text{H}_{16}\text{ClNO}$ : C, 63.8; H, 7.1; N, 6.2. Found: C, 63.98; H, 7.33; N, 6.19.

## 2-(4-isobutylphenyl)propanamide **1c**

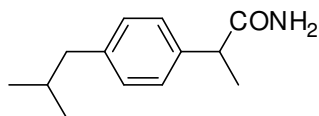

The amide was prepared by the procedure described in Method C from the corresponding acid.

White Solid, mp 106-107 °C (lit.<sup>8</sup> mp 107-108 °C),  $^1\text{H}$  NMR (60 MHz,  $\text{CDCl}_3$ ):  $\delta$  7.28(d,  $J = 7.9$  Hz, 2H), 7.18(d,  $J = 7.9$  Hz, 2H), 5.5-5.3(bs, 2H), 3.78-3.42(q,  $J = 7.3$  Hz, 1H), 2.53-2.42(q,  $J = 7.2$  Hz, 2H), 1.97-1.88(m, 1H), 1.59-1.49(d,  $J = 7.3$  Hz, 3H), 0.96-0.86(d,  $J = 6.6$  Hz, 6H) ppm. IR (KBr)  $\nu_{\text{max}}$ : 3354, 3201, 1657 and 1641  $\text{cm}^{-1}$ .

## 2-Phenylpentanamide **1d**

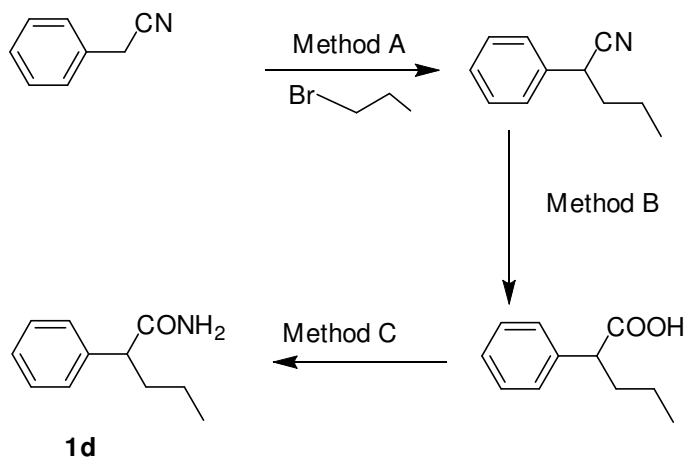

White solid, mp 80-81 °C (lit.<sup>1</sup> mp 83-85 °C),  $^1\text{H}$  NMR (60 MHz,  $\text{CDCl}_3$ ):  $\delta$  7.31(s, 5H), 5.47(bs, 2H), 3.58-3.27(t, 1H), 2.21-0.90(m, 7H) ppm. IR (KBr)  $\nu_{\text{max}}$ : 3409, 3185, 1650, 1617 and 1492  $\text{cm}^{-1}$ .

## 2-Phenylpropanamide 1e

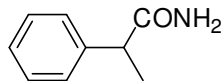

The amide was prepared as per the procedure described in Method C from the corresponding acid.

White solid, mp 93-95 °C (lit.<sup>8</sup> mp 94-95 °C), <sup>1</sup>H NMR (60 MHz, CDCl<sub>3</sub>): δ 7.21(s, 5H), 5.63-5.73(bs, 2H), 3.31(q, *J* = 7.3 Hz, 1H), 1.1(d, *J* = 7.3 Hz, 3H) ppm. IR (KBr) ν<sub>max</sub>: 3376, 3174 and 1665 cm<sup>-1</sup>.

## 2-(2-fluorobiphenyl-4-yl)propanamide 1f

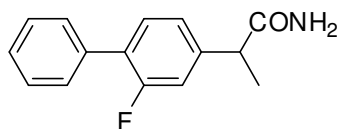

The amide was prepared as procedure described in Method C from the corresponding acid.

White solid, mp 123-125 °C (lit.<sup>10</sup> mp 122-124 °C) <sup>1</sup>H NMR (60 MHz, CDCl<sub>3</sub>): δ 7.46-7.06(m, 8H), 5.53(bs, 2H), 3.69-3.45(q, 1H), 1.61-1.49(d, 3H) ppm. IR (KBr) ν<sub>max</sub>: 3400, 3189, 1659, and 1627, 1560 and 1482 cm<sup>-1</sup>.

## 4-Cyano-2-methyl-4-phenylbutanamide 1g

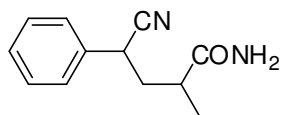

To a stirred solution of 1.34 g (56 mmol) of NaH in 20 ml of DMF was added slowly 6.0 g (51 mmol) of phenylacetonitrile and 4.34 g (51 mmol) of methacrylamide and refluxed for 7 h. The reaction mixture was cooled to room temperature, poured in water, neutralized with 10% dil HCl and extracted with ethyl acetate (2 x 20 ml), organic layer was separated, washed with (3 x 20 ml) water, dried over anhydrous sodium sulfate and concentrated to give crude amide. Purification was carried by silica gel

column chromatography (ethyl acetate: hexane = 15: 85) afforded **1g** as a White solid, mp 119-121 °C, <sup>1</sup>H NMR (300 MHz, CDCl<sub>3</sub>): δ 8.08-8.00(bs, 2H), 7.4-7.2(m, 5H), 3.79-3.73(dd, 1H), 2.78-2.56(m, 1H), 2.30-2.00(m, 2H), 1.40-1.23(dd, 3H) ppm. <sup>13</sup>C NMR (300 MHz, CDCl<sub>3</sub>): 174.9, 137.5, 128.8, 128.5, 127.7, 127.6, 49.6, 37.6, 35.6, 15.0 ppm. IR (KBr) ν<sub>max</sub>: 3349, 3239, 2185 and 1664 cm<sup>-1</sup>. Elemental analysis calcd for C<sub>12</sub>H<sub>14</sub>N<sub>2</sub>O: C, 71.29; H, 6.93; N, 13.86. Found: C, 71.1; H, 6.83; N, 13.62.

### 2-Methyl-3-(2-oxo-cyclohexyl)propanamide **1h**

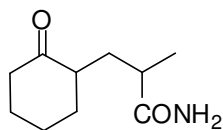

To a stirred solution of 1.34 g (56 mmol) of NaH in 20 ml of DMF was added slowly 5.0 g (51 mmol) of cyclohexanone and 4.34 g (51 mmol) of methacrylamide and refluxed for 7 h. The reaction mixture was cooled to room temperature, poured in water, neutralized with 10% dil HCl and extracted in ethyl acetate (2 x 20 ml), organic layer was separated, washed with (3 x 20 ml) water, dried over anhydrous sodium sulfate and concentrated to give crude amide. Purification was carried by silica gel column chromatography (ethyl acetate: hexane = 15: 85) afforded **1h** as a White solid, mp 109-111 °C, <sup>1</sup>H NMR (300 MHz, CDCl<sub>3</sub>): δ 6.85 (bs, 2H), 2.55-2.47(m, 1H), 2.23-2.16(m, 1H), 2.06-2.00(m, 5H) 1.74-1.66(m, 5H), 1.21-1.19(d, 3H) ppm. <sup>13</sup>C NMR (300 MHz, CDCl<sub>3</sub>): 174.6, 128.1, 109.4, 35.0, 34.2, 27.9, 25.9, 22.7, 22.3, 15.7 ppm. IR (KBr) ν<sub>max</sub> : 3217, 3175, 2936, 2833, 1706 and 1659 cm<sup>-1</sup>. Elemental analysis calcd for C<sub>10</sub>H<sub>17</sub>NO<sub>2</sub>: C, 65.5; H, 9.3; N, 7.7. Found: C, 65.72; H, 9.27; N, 7.5.

### Cyclohexanecarboxamide **1i**

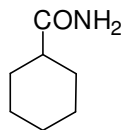

The amide was prepared as procedure described in Method C from the corresponding acid.

White solid, mp 180-182 °C (lit.<sup>1</sup> mp 186-187 °C) <sup>1</sup>H NMR (60 MHz, CDCl<sub>3</sub>): δ 5.51(bs, 2H), 1.84-1.36(m, 11H) ppm. IR (KBr) ν<sub>max</sub>: 3380, 3185, 2927, 2853 and 1655 cm<sup>-1</sup>.

### 2-Ethylhexanamide 1j

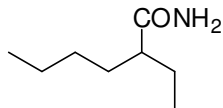

The amide was prepared as procedure described in Method C from the corresponding acid.

White solid, mp 101-104 °C (lit.<sup>1</sup> mp 102-103 °C) <sup>1</sup>H NMR (60 MHz, CDCl<sub>3</sub>): δ 5.60(bs, 2H), 1.86-1.84(m, 1H), 1.51-0.88(m, 14H) ppm. IR (KBr) ν<sub>max</sub>: 3342, 3165, 2927, 2851 and 1669 cm<sup>-1</sup>.

### 2-(1-methyl-1H-pyrrol-2-yl)-3-phenylpropanamide 1k

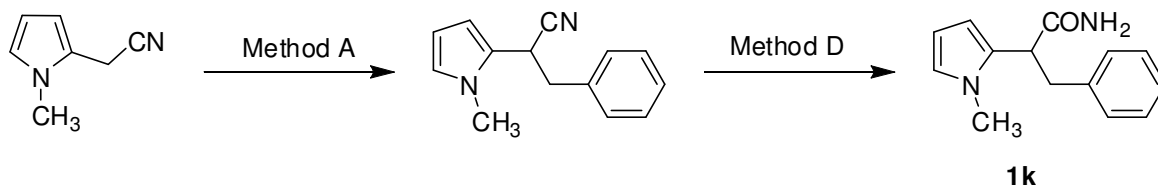

White solid, mp 111-112 °C, <sup>1</sup>H NMR (300 MHz, CDCl<sub>3</sub>): δ 7.25-7.12 (m, 5H), 6.54(s, 1H), 6.13-6.07(m, 2H), 5.56(bs, 2H) 3.79-3.73(m, 1H), 3.48-3.34(m, 4H), 3.15-3.08(m, 1H) ppm. <sup>13</sup>C NMR (300 MHz, CDCl<sub>3</sub>): 174.8, 139.2, 130.1, 128.9, 128.3, 126.4, 122.9, 107.3, 107.31, 47.1, 38.4, 33.7 ppm. IR (KBr) ν<sub>max</sub> : 3217, 3175, 2936, 2833, 1655 cm<sup>-1</sup>. Elemental analysis calcd for C<sub>14</sub>H<sub>16</sub>N<sub>2</sub>O: C, 73.66; H, 7.06; N, 12.27. Found: C, 73.57; H, 7.02; N, 12.23.

### 1-methylpyrrolidine-2-carboxamide 1l

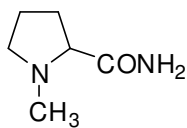

White solid, mp 139-141 °C (lit.<sup>11</sup> mp 140-141 °C) <sup>1</sup>H NMR (300 MHz, DMSO-d<sub>6</sub>): δ 1.75-1.63 (m, 3H), 1.90-2.15 (m, 6H), 3.14-2.99(m, 1H), 7.20 (bs, 2H) ppm. IR (KBr) ν<sub>max</sub>: 2925, 2853 and 1659 cm<sup>-1</sup>.

## References:

1. *Dictionary of Organic compounds*, 6<sup>th</sup> ed.; Bukiyahan J., Macdonald, F., Chapman and Hall Electric Publishing House, London, 1996.
2. Friour, G.; Normant, J. F. *Synthesis* **1984**, 37.
3. Parrinello, G.; Stille, J. K. *J. Am. Chem. Soc.* **1987**, 109, 7122.
4. Takeda, M.; Taniyama, E.; Ozawa, Y.; Imanari, M.; Takahashi, K.; Iwane, H. U.S. Patent 4 263 457, 1981.
5. Agami, C.; Levisalles, J.; Puchot, C. *J. Org. Chem.* **1982**, 47, 3561.
6. Jacobson, R. M.; Rath, R. A.; McDonald, J. H. *J. Org. Chem.* **1977**, 42, 2545.
7. Theilacker, W.; Fauser, K. *Justus Liebigs Ann. Chem.* **1939**, 539, 103.
8. Snell, D.; Colby, J. *Enzyme Microb. Technol.* **1999**, 24, 160.
9. Makosza, M. and Jonczyk, A. *Organic Syntheses, Coll. Vol. 6*, **1988**, 897.
10. Satyam, A. World Patent 027711, 2006.
11. Sassaman, M. B.; Giovanelli, J.; Sood, V. K.; Eckelman, W. C. *Bioorg. Med. Chem.* **1998**, 6, 1759.
12. Greenhouse, R.; Ramirez, C. *J. Org. Chem.* **1985**, 50, 2961.

<sup>1</sup>H NMR of 2-(4-Chlorophenyl)hexanamide **1b**

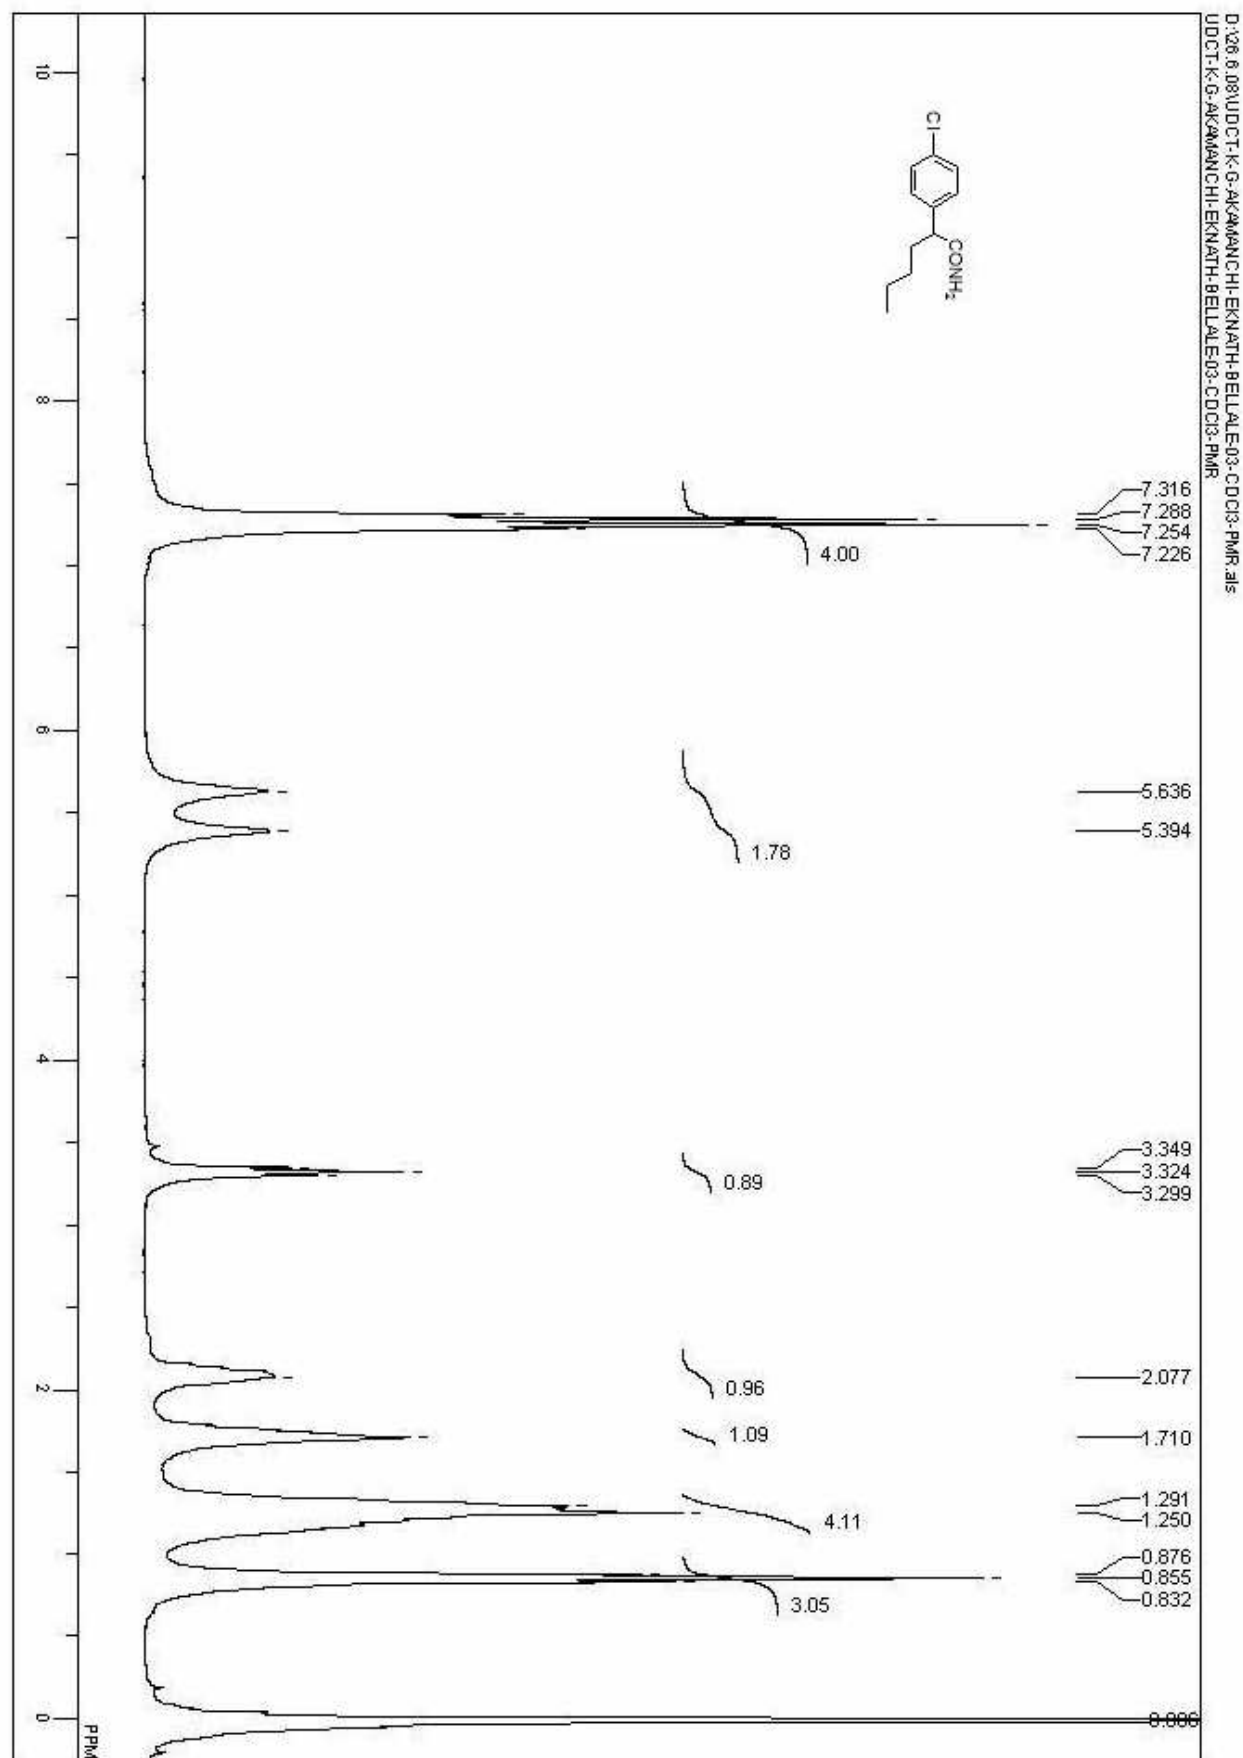

<sup>13</sup>C NMR of 2-(4-Chlorophenyl)hexanamide **1b**

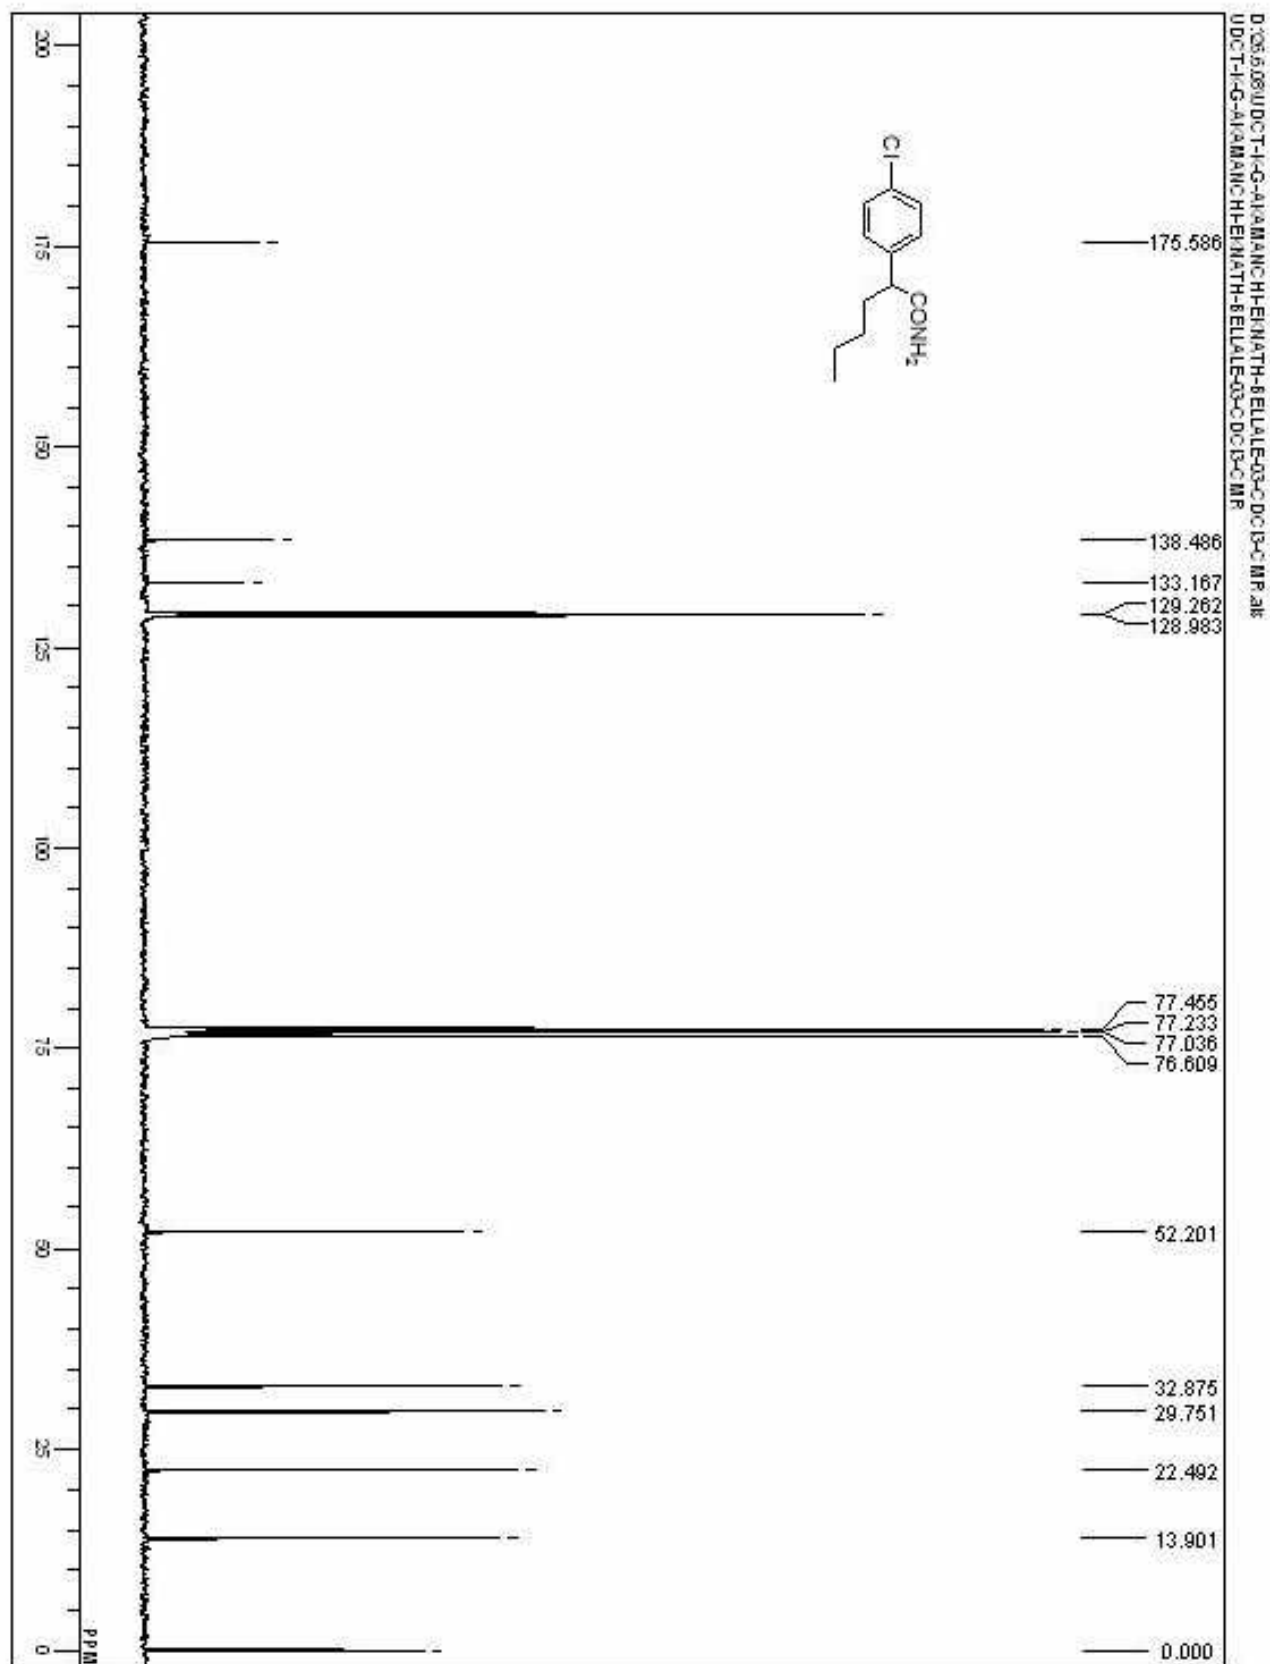

<sup>1</sup>H NMR of 4-Cyano-2-methyl-4-phenylbutanamide **1g**

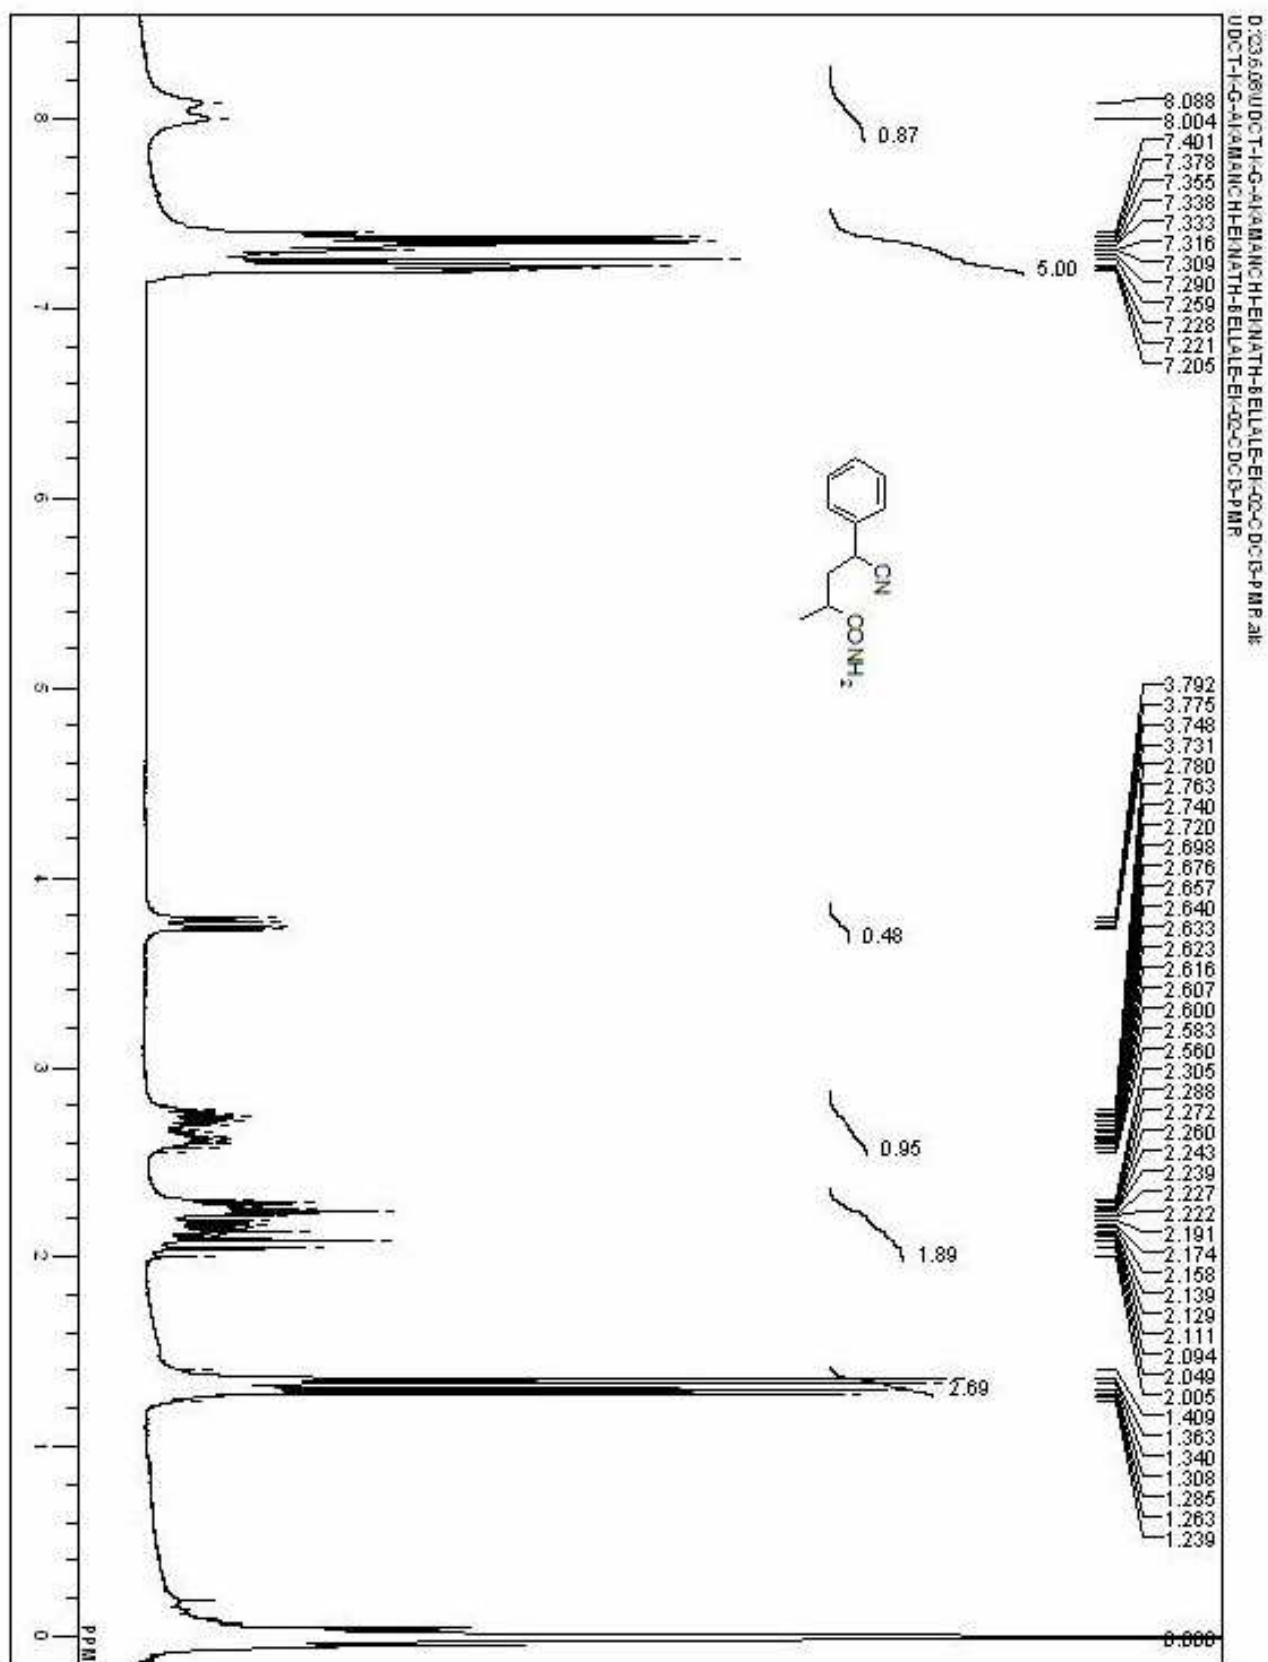



<sup>13</sup>C NMR of 4-Cyano-2-methyl-4-phenylbutanamide **19**

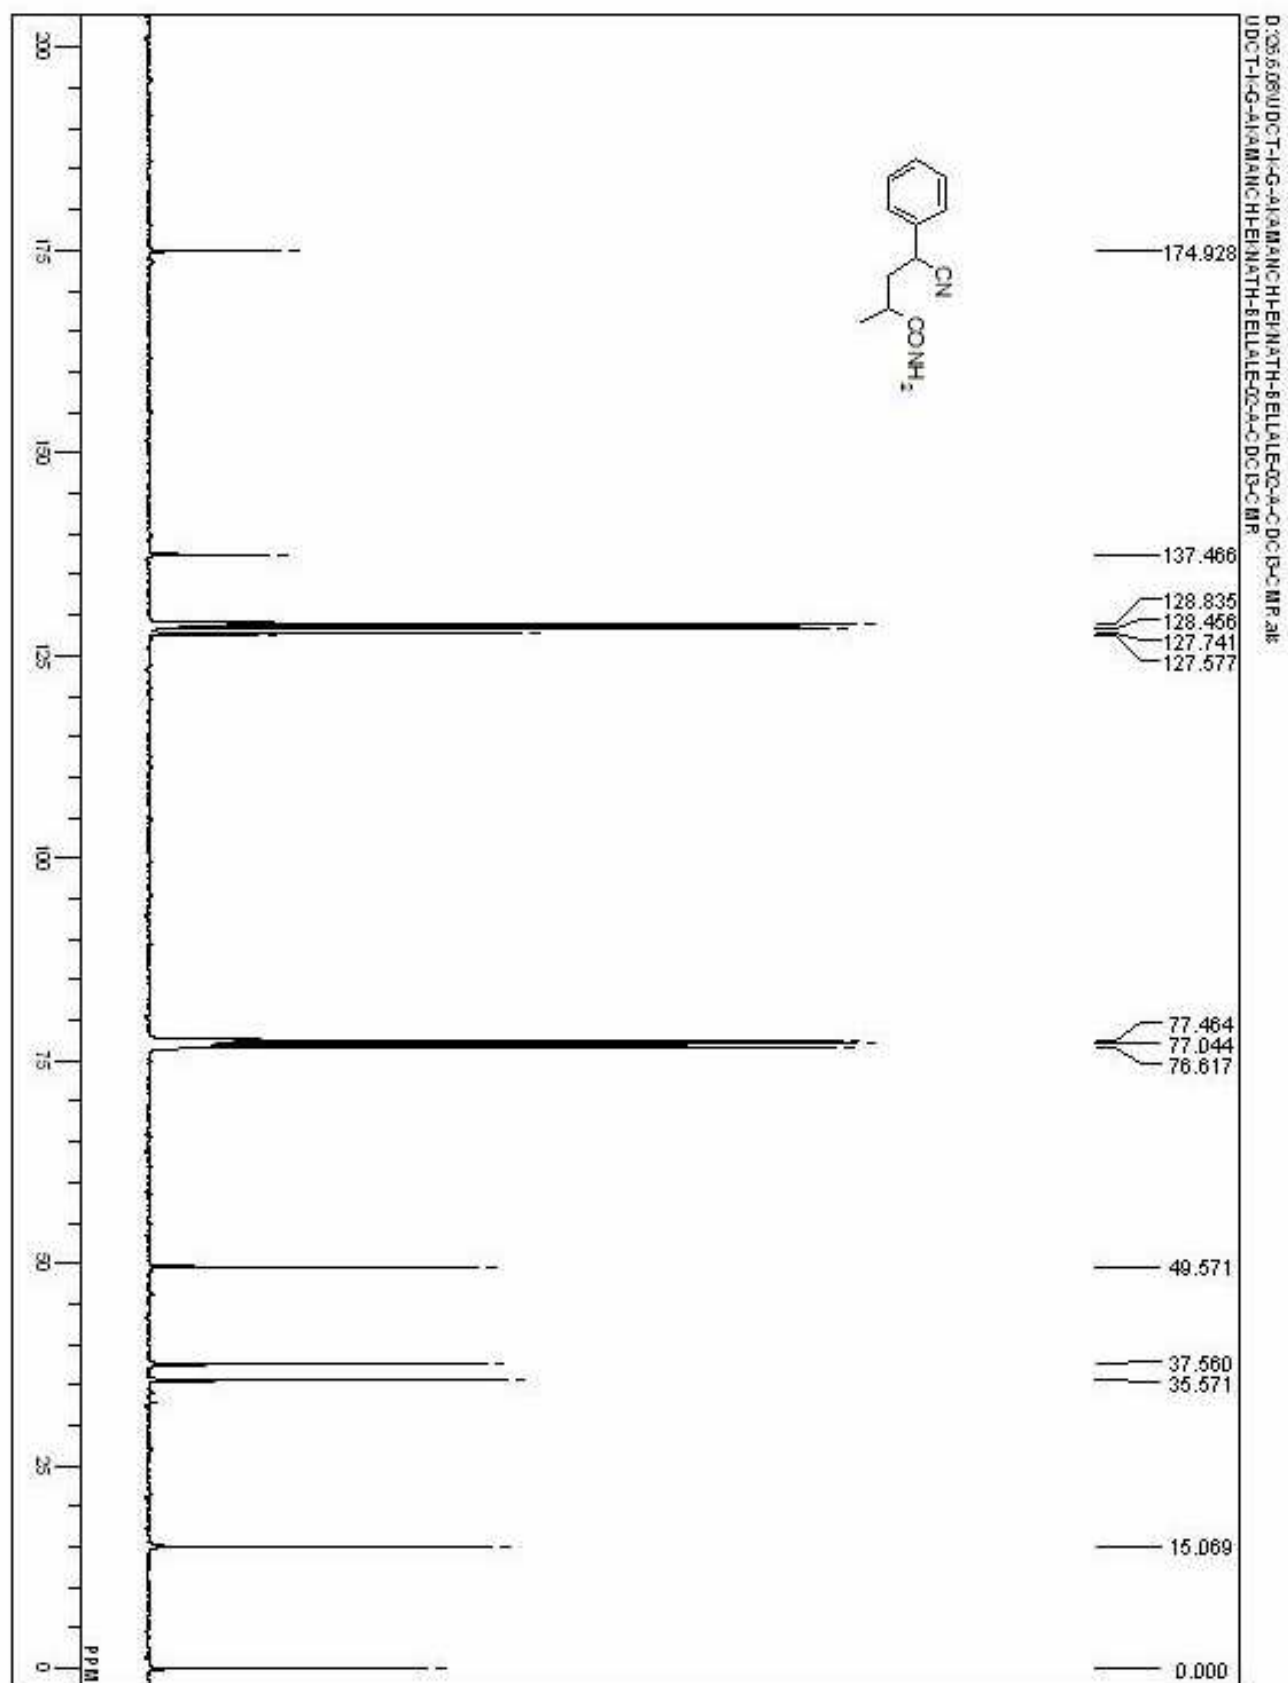

<sup>1</sup>H NMR of 2-Methyl-3-(2-oxo-cyclohexyl)propanamide **1h**

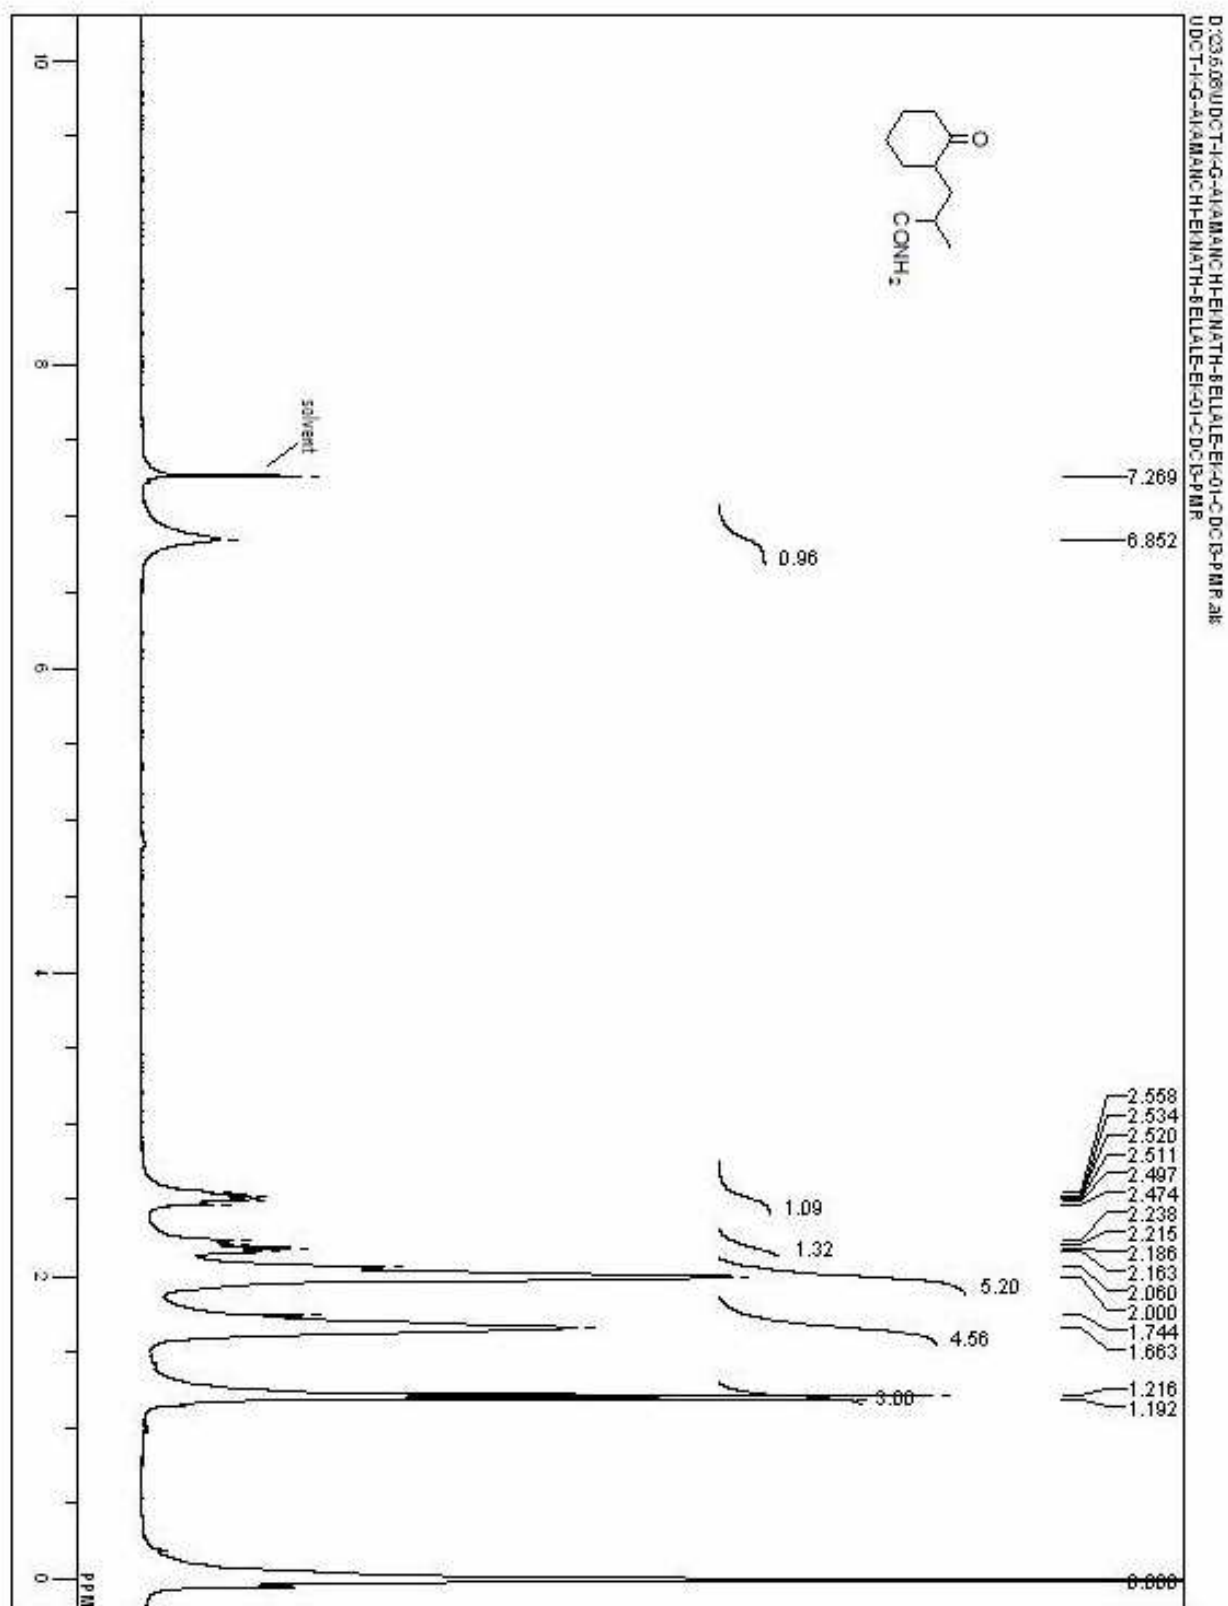

<sup>13</sup>C NMR of 2-Methyl-3-(2-oxo-cyclohexyl)propanamide **1h**

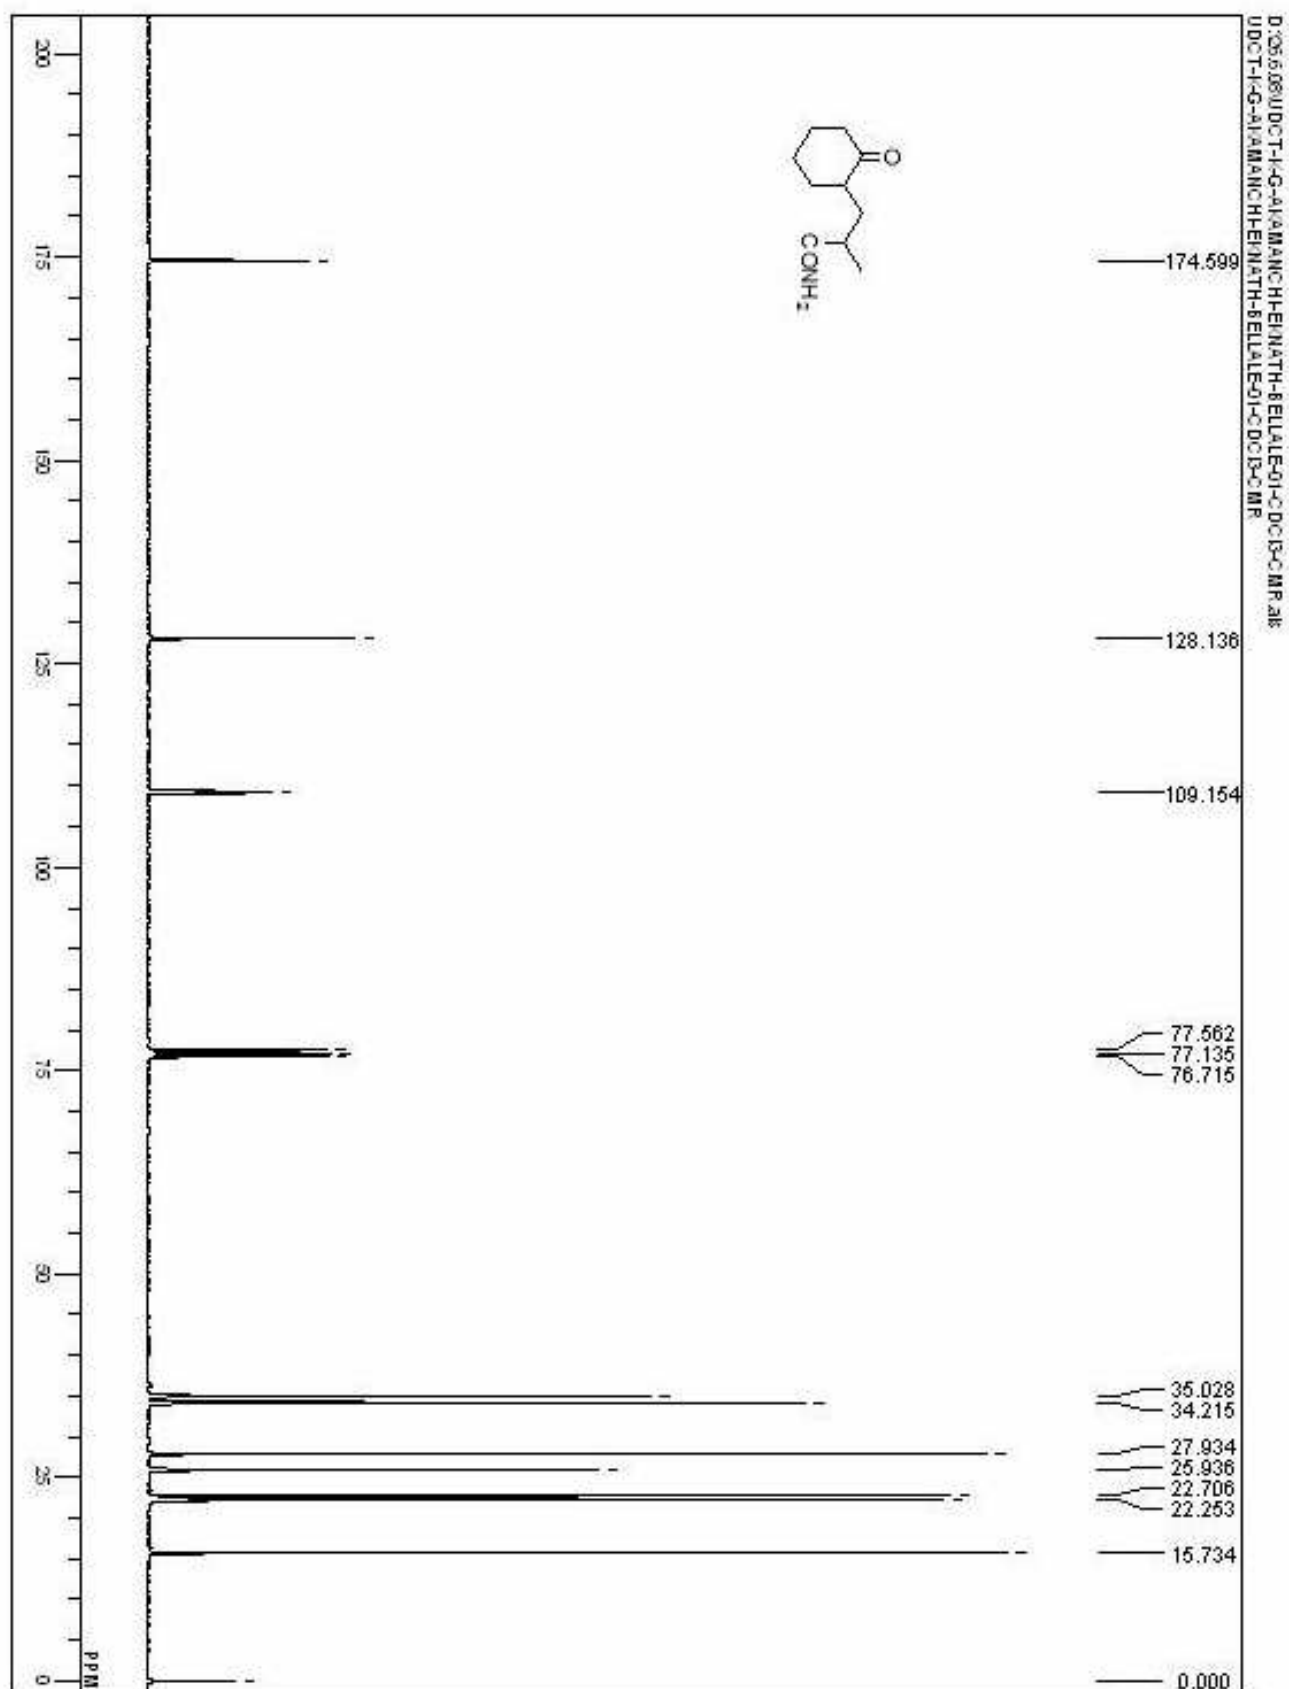

<sup>1</sup>H NMR of 2-(1-methyl-1H-pyrrol-2-yl)-3-phenylpropanamide **1k**

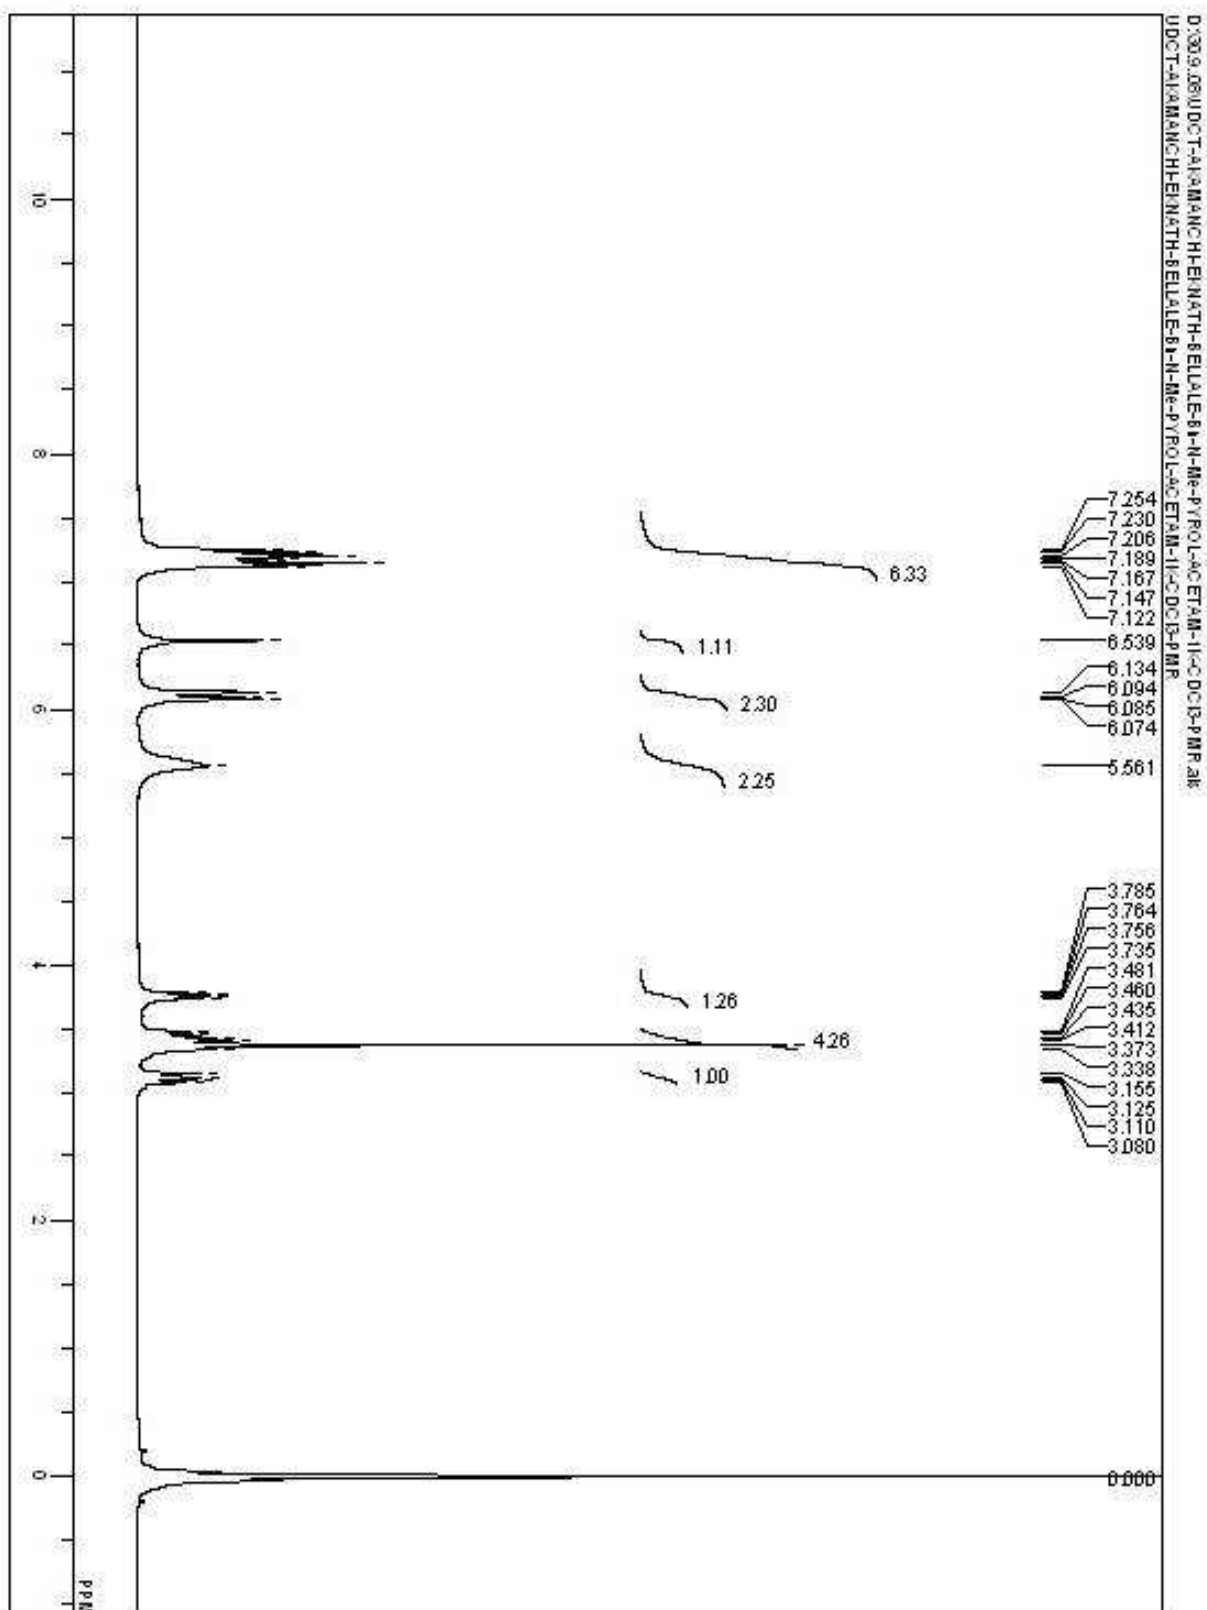

<sup>13</sup>C NMR of NMR of 2-(1-methyl-1H-pyrrol-2-yl)-3-phenylpropanamide **1k**

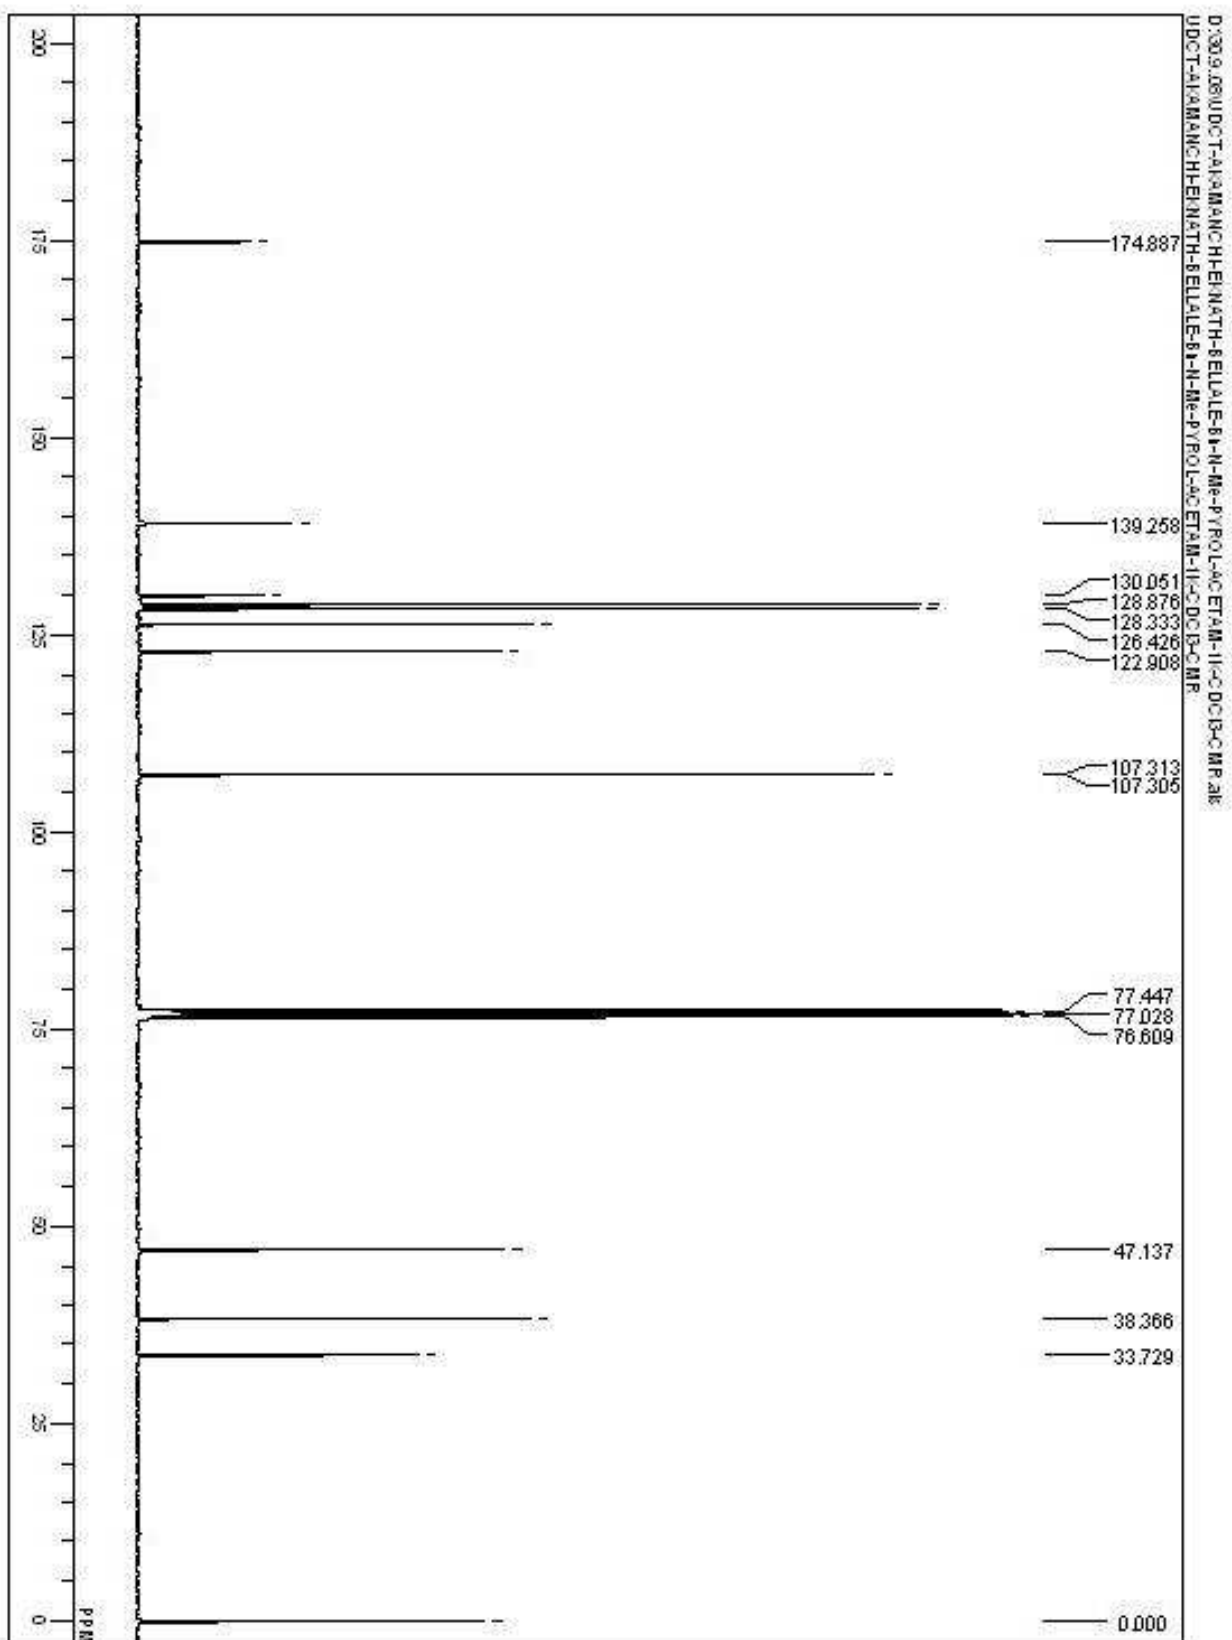

<sup>1</sup>H NMR of Benzophenone 2a

D:\23.7.08\UDCT-K-G-AKAMANCHI-EKNATH-BELLALE-BENZO-PHENONE2a-CDCl3-PMR.a1s  
UDCT-K-G-AKAMANCHI-EKNATH-BELLALE-BENZO-PHENONE2a-CDCl3-PMR

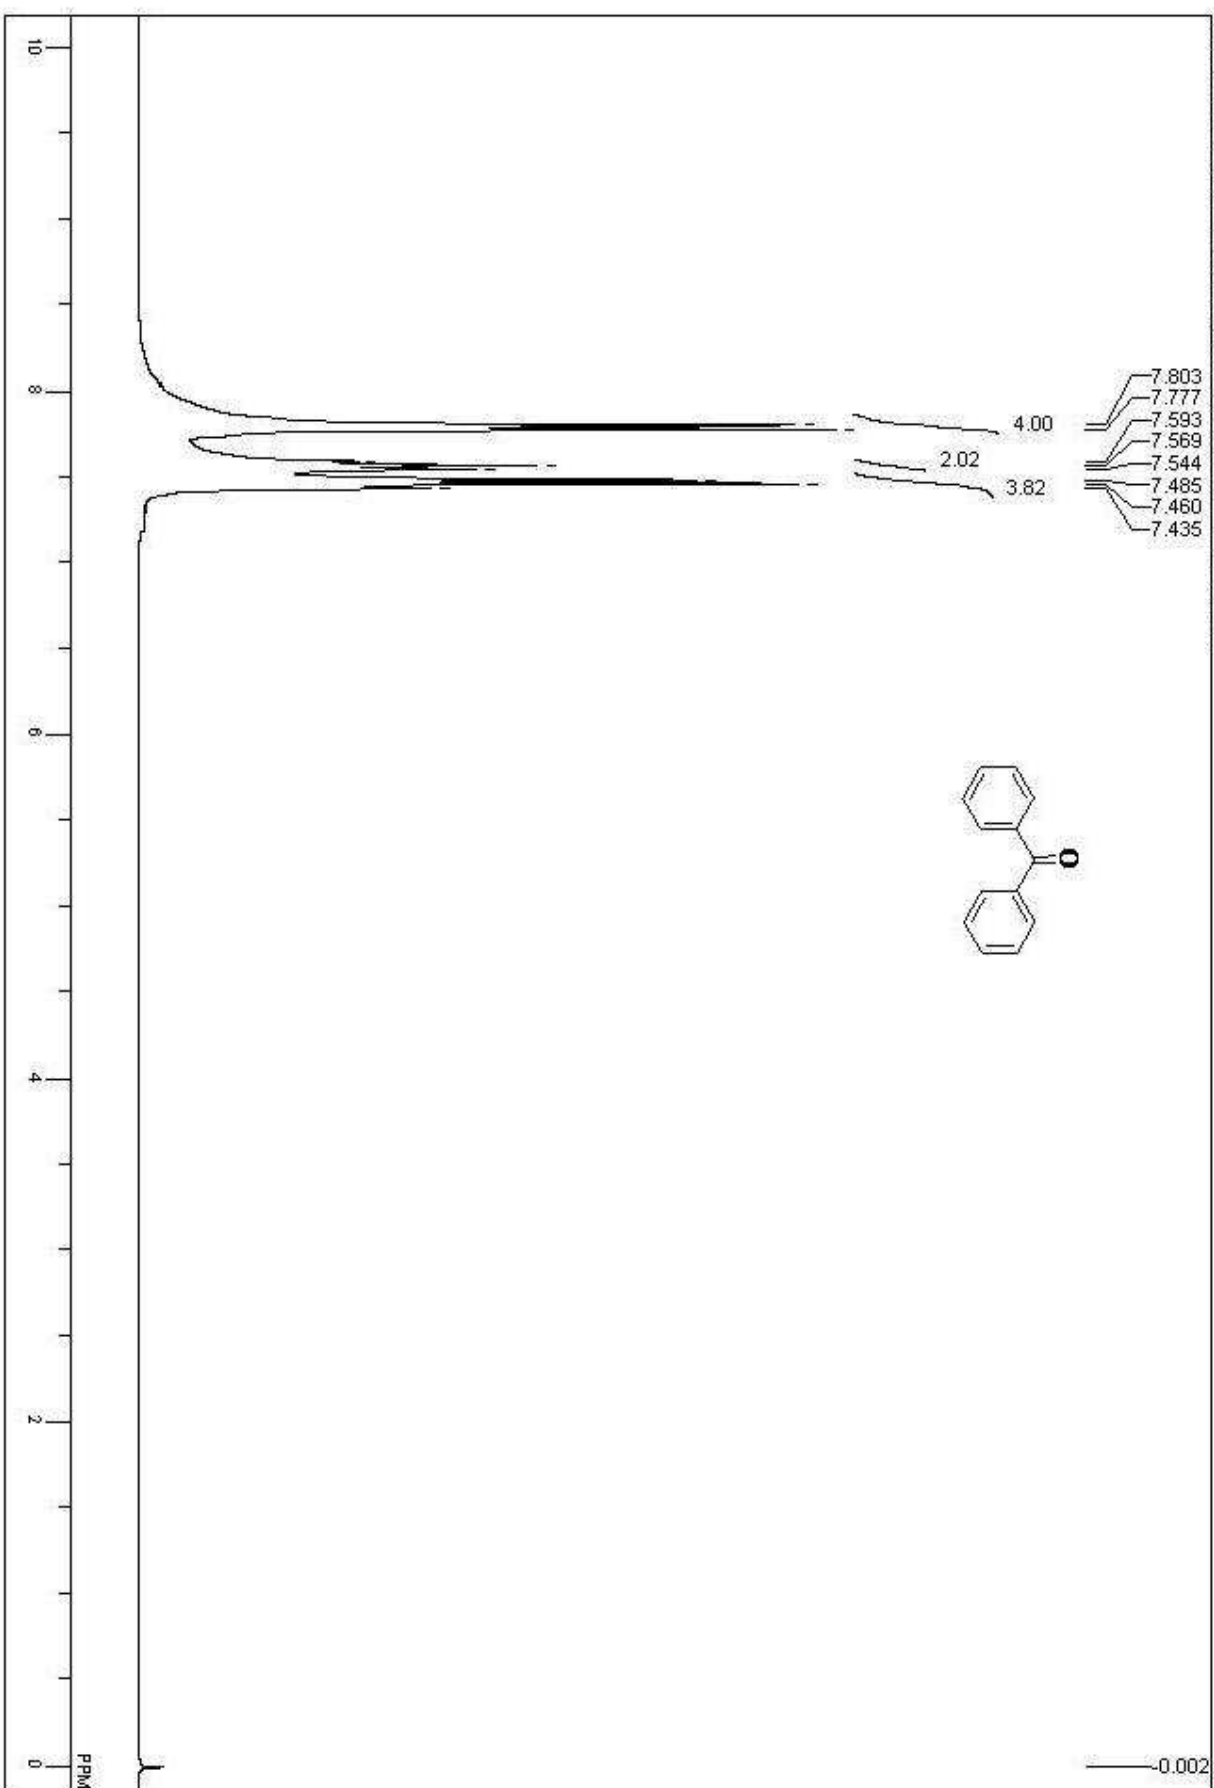

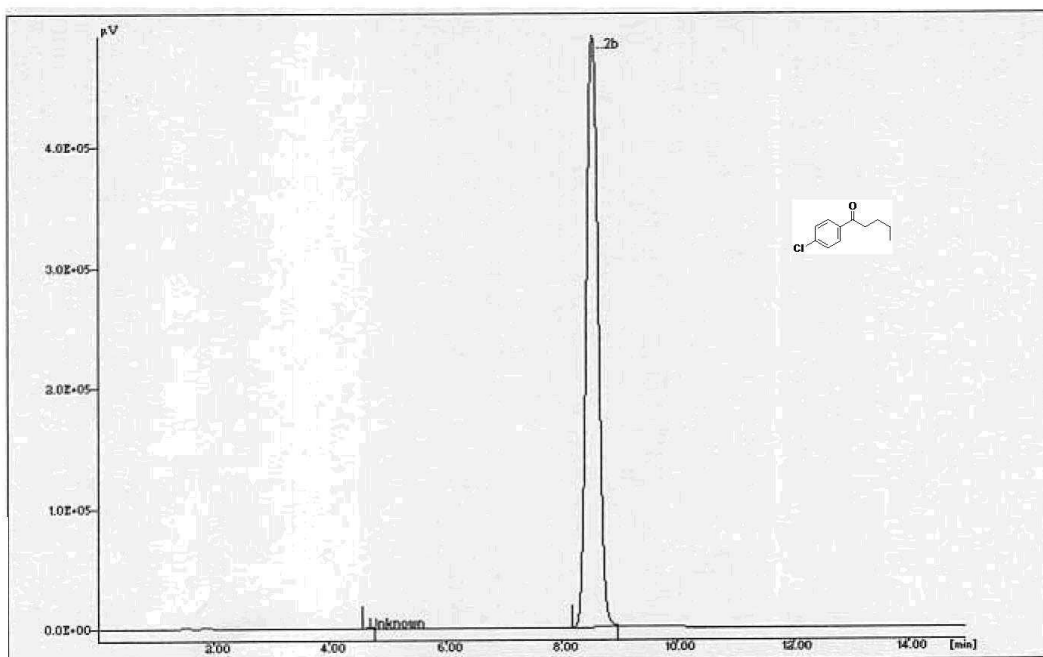

File name : 1-(4-Chlorophenyl)pentan-1-one 2b

**Info :**

SYSTEM : ACN:Water ( 3:1) flow : 1 ml/min.

WAVELENGTH : 254

Injection Date :29-Jul-2008 4:44:14

Curr. Date : 29-Jul-2008 9:01:28

User : EKNATH

Group : KGA

Control Method :

| Sr.No. | Name | RT    | Area(μV.Sec) | %Area  |
|--------|------|-------|--------------|--------|
| 1      |      | 4.662 | 3821.250     | 0.062  |
| 2      | 2b   | 8.515 | 6184749.410  | 99.938 |

Total Area of Peak = 6188570.660 [μV.Sec]

<sup>1</sup>H NMR of 1-(4-Isobutylphenyl)ethanone **2c**

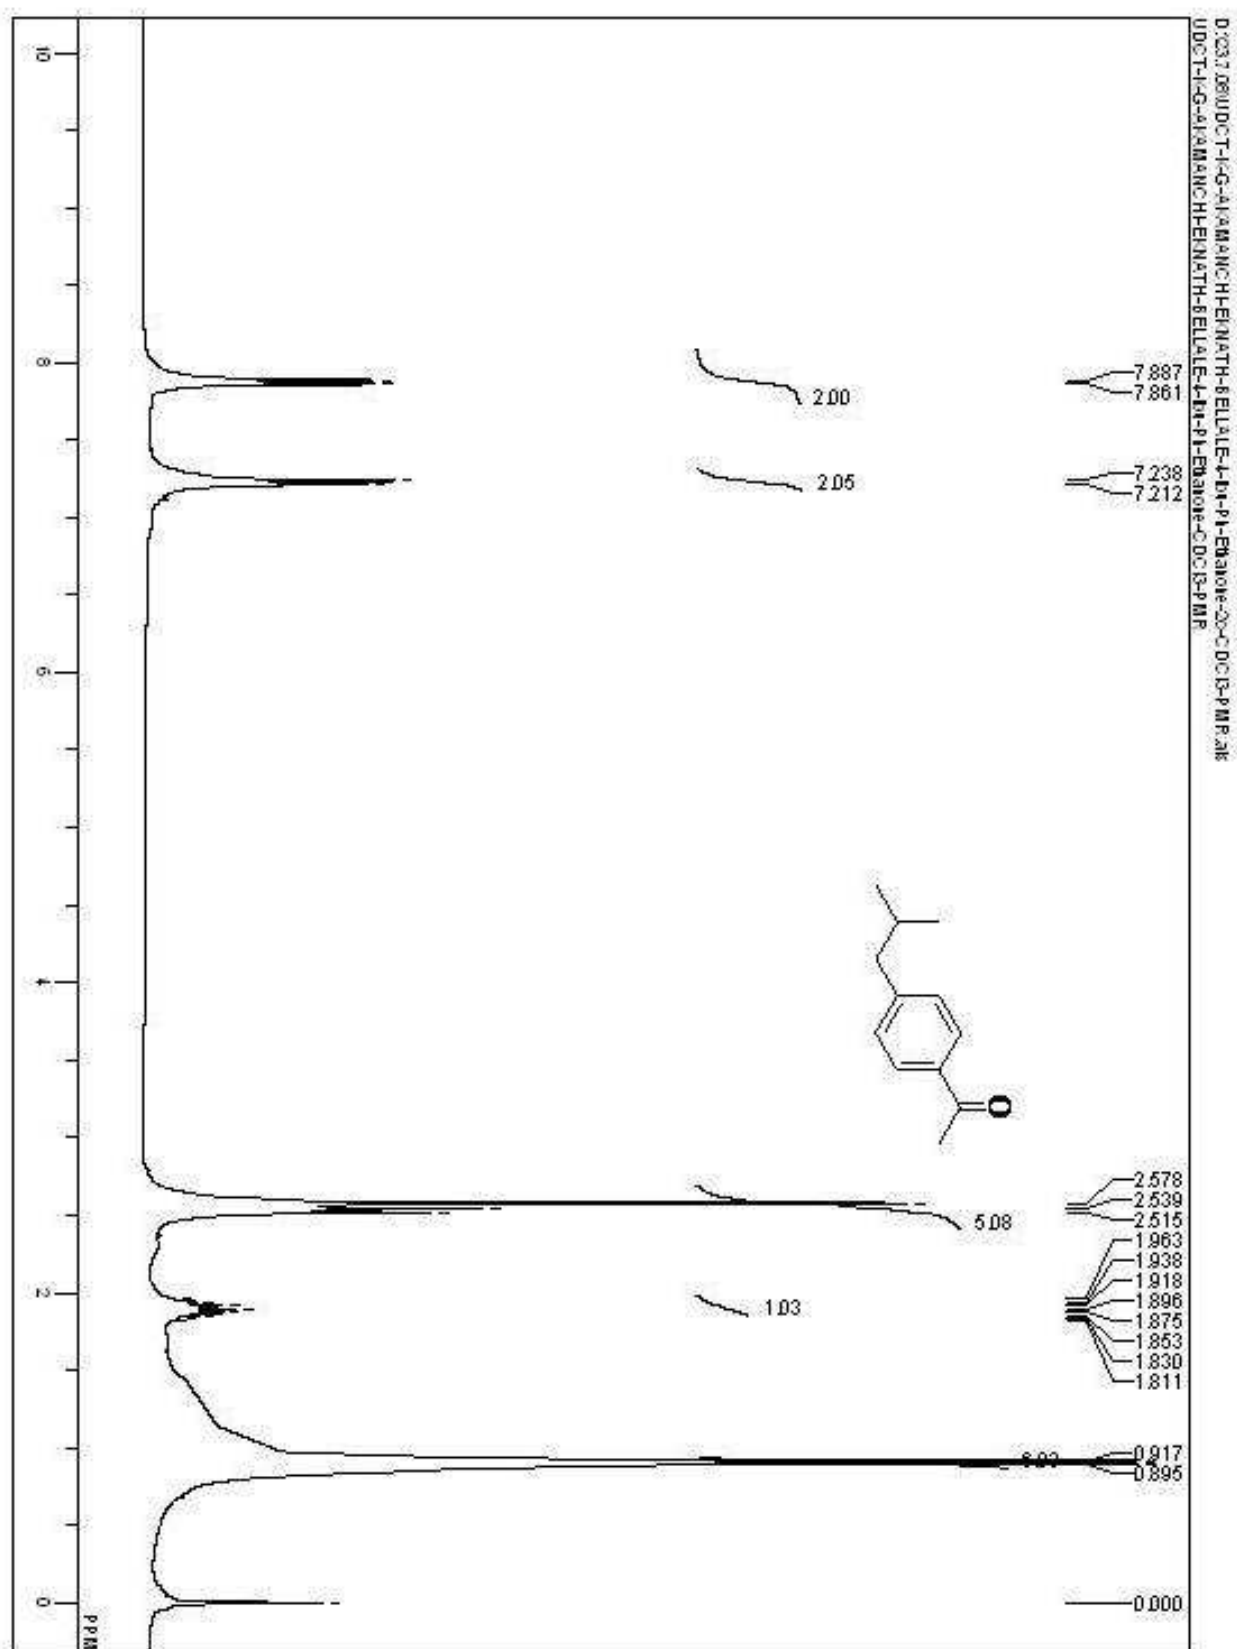



<sup>1</sup>H NMR of Butyrophenone **2d**

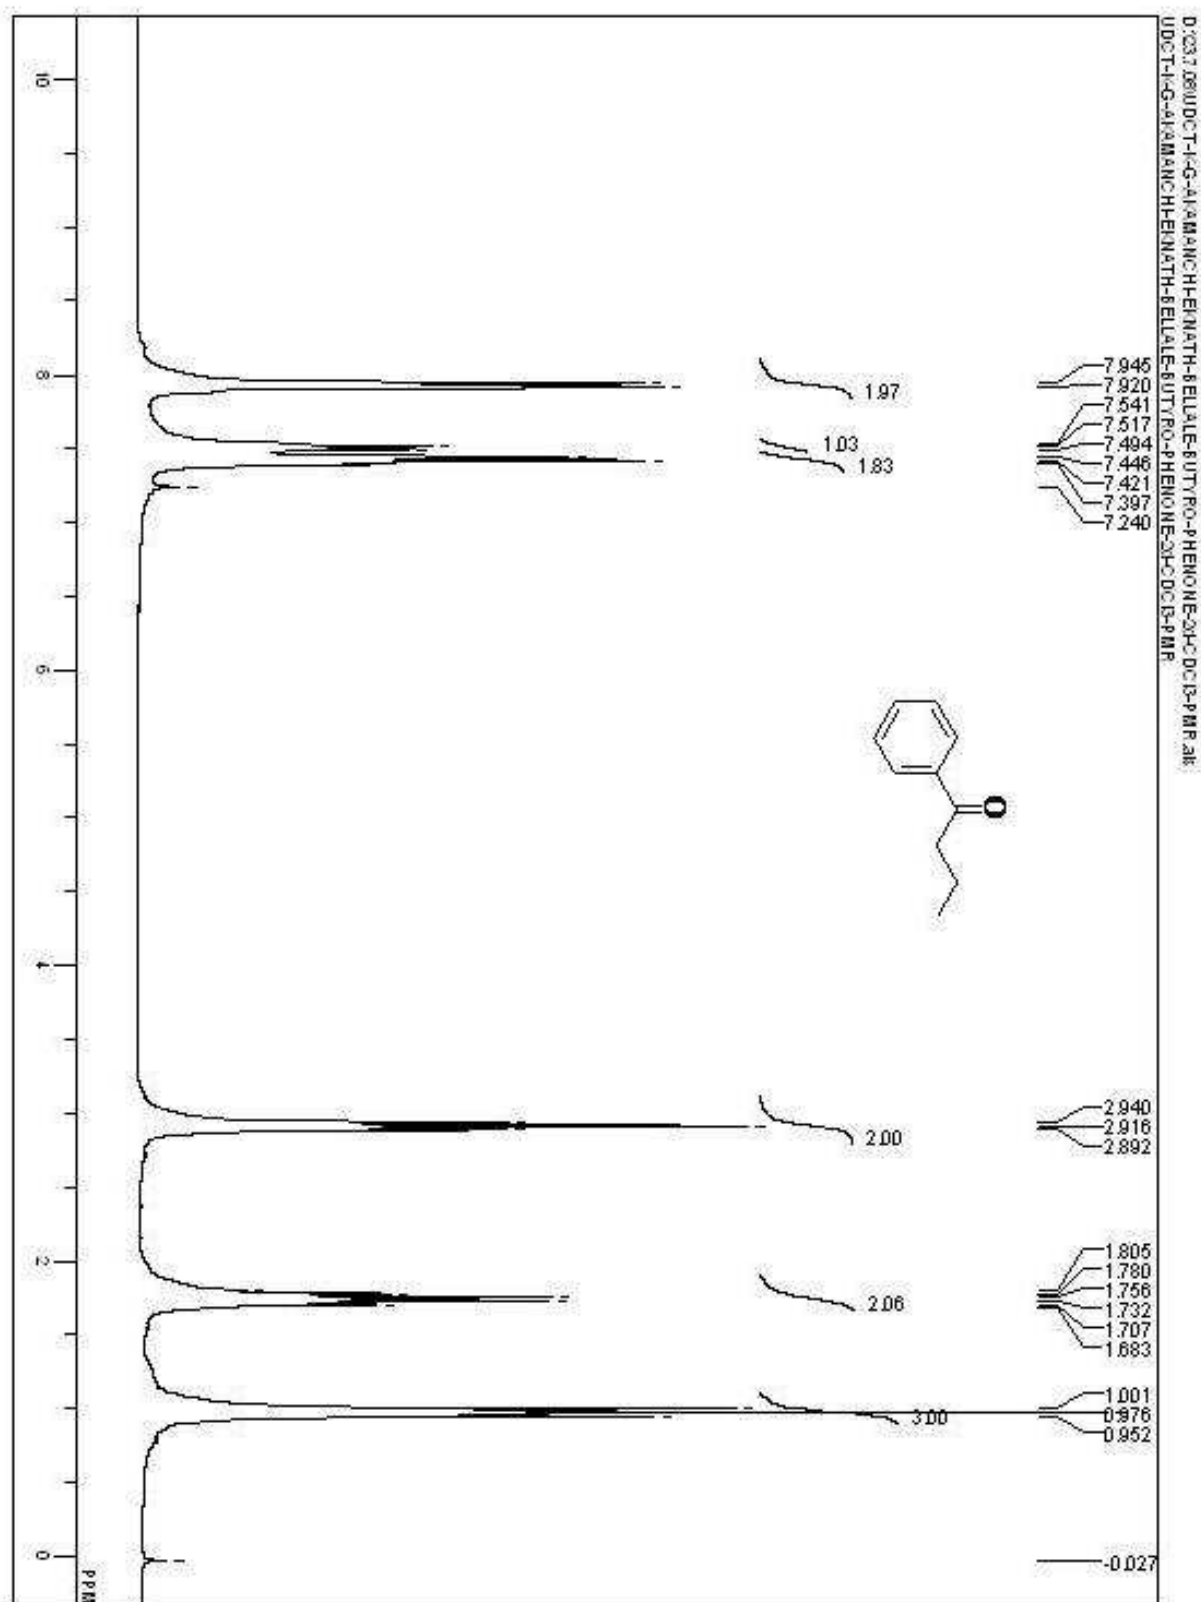

<sup>1</sup>H NMR of Acetophenone **2e**

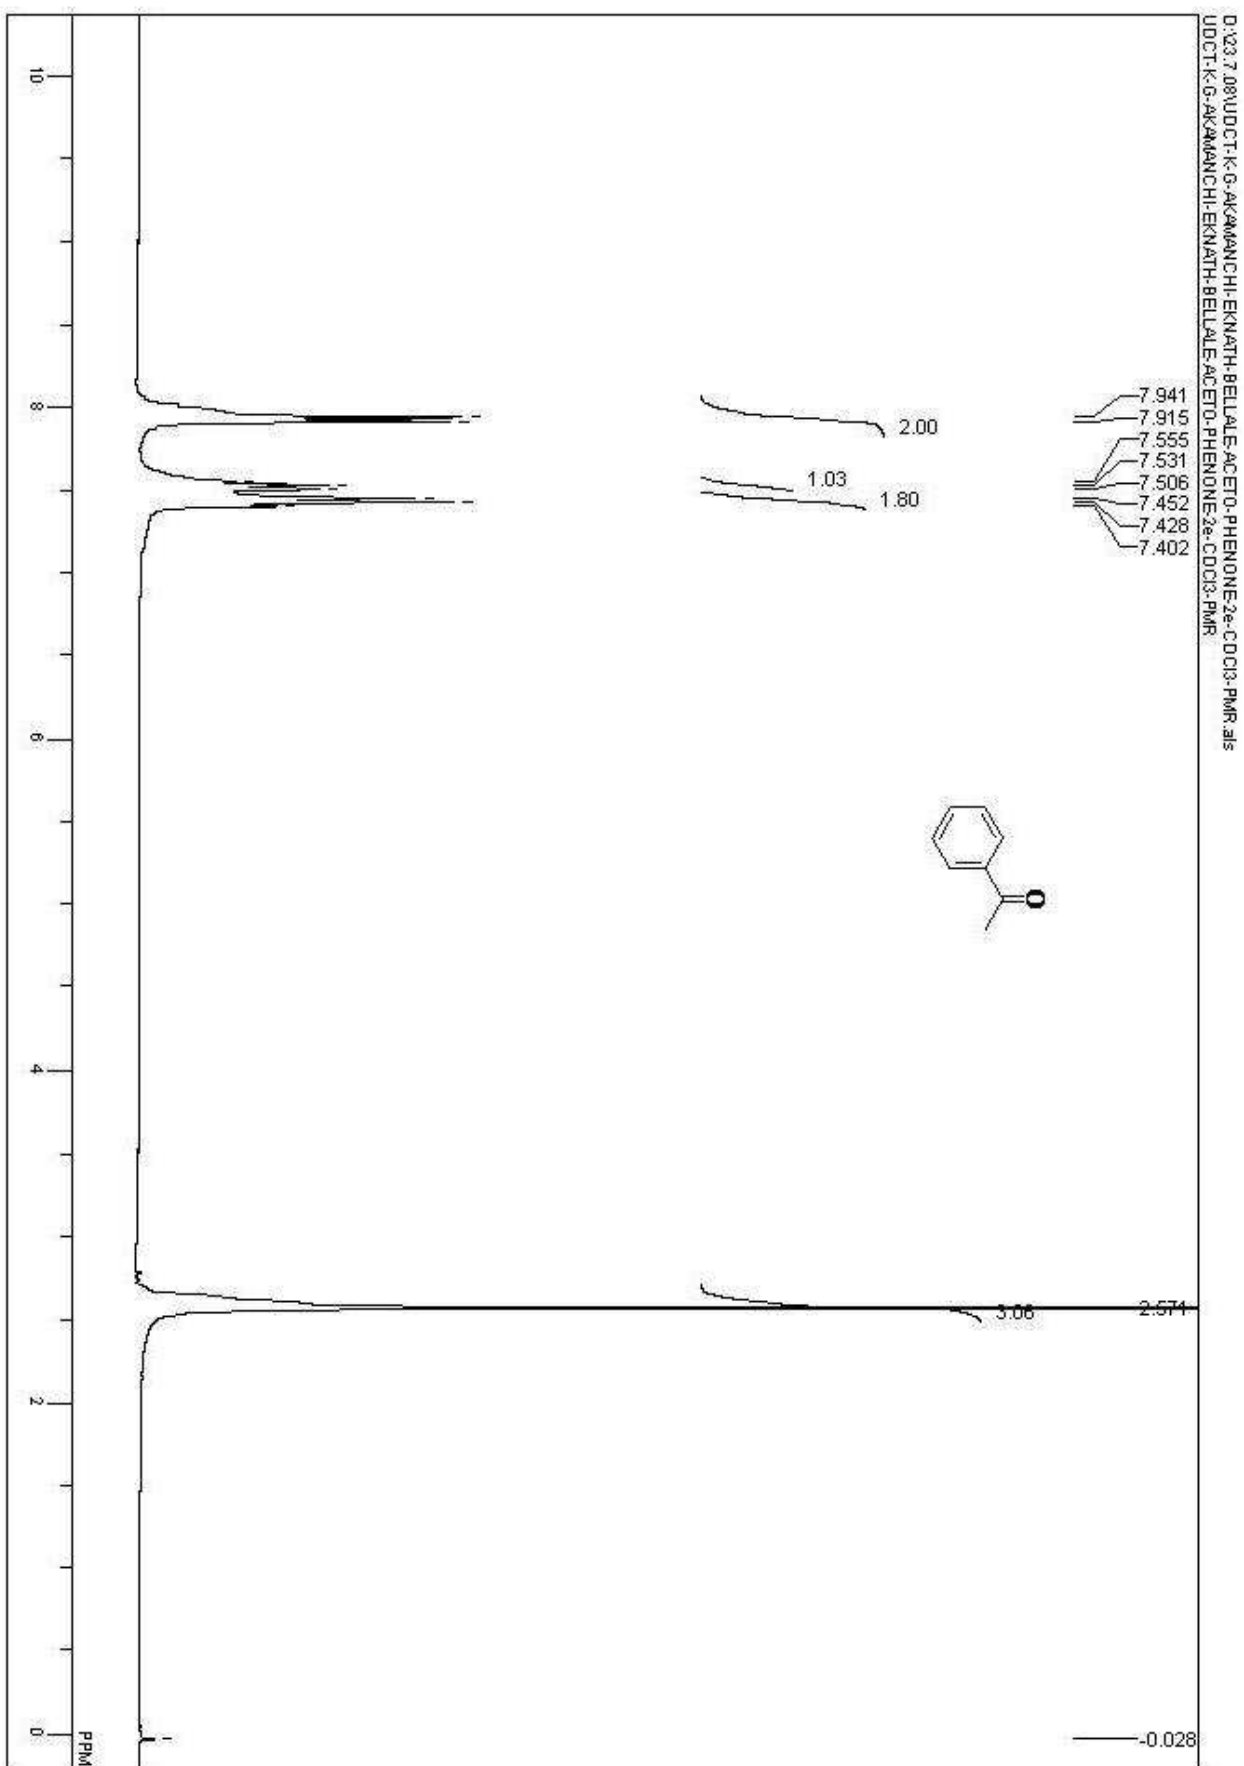

<sup>1</sup>H NMR of 1-(2-Fluorobiphenyl-4-yl)ethanone **2f**

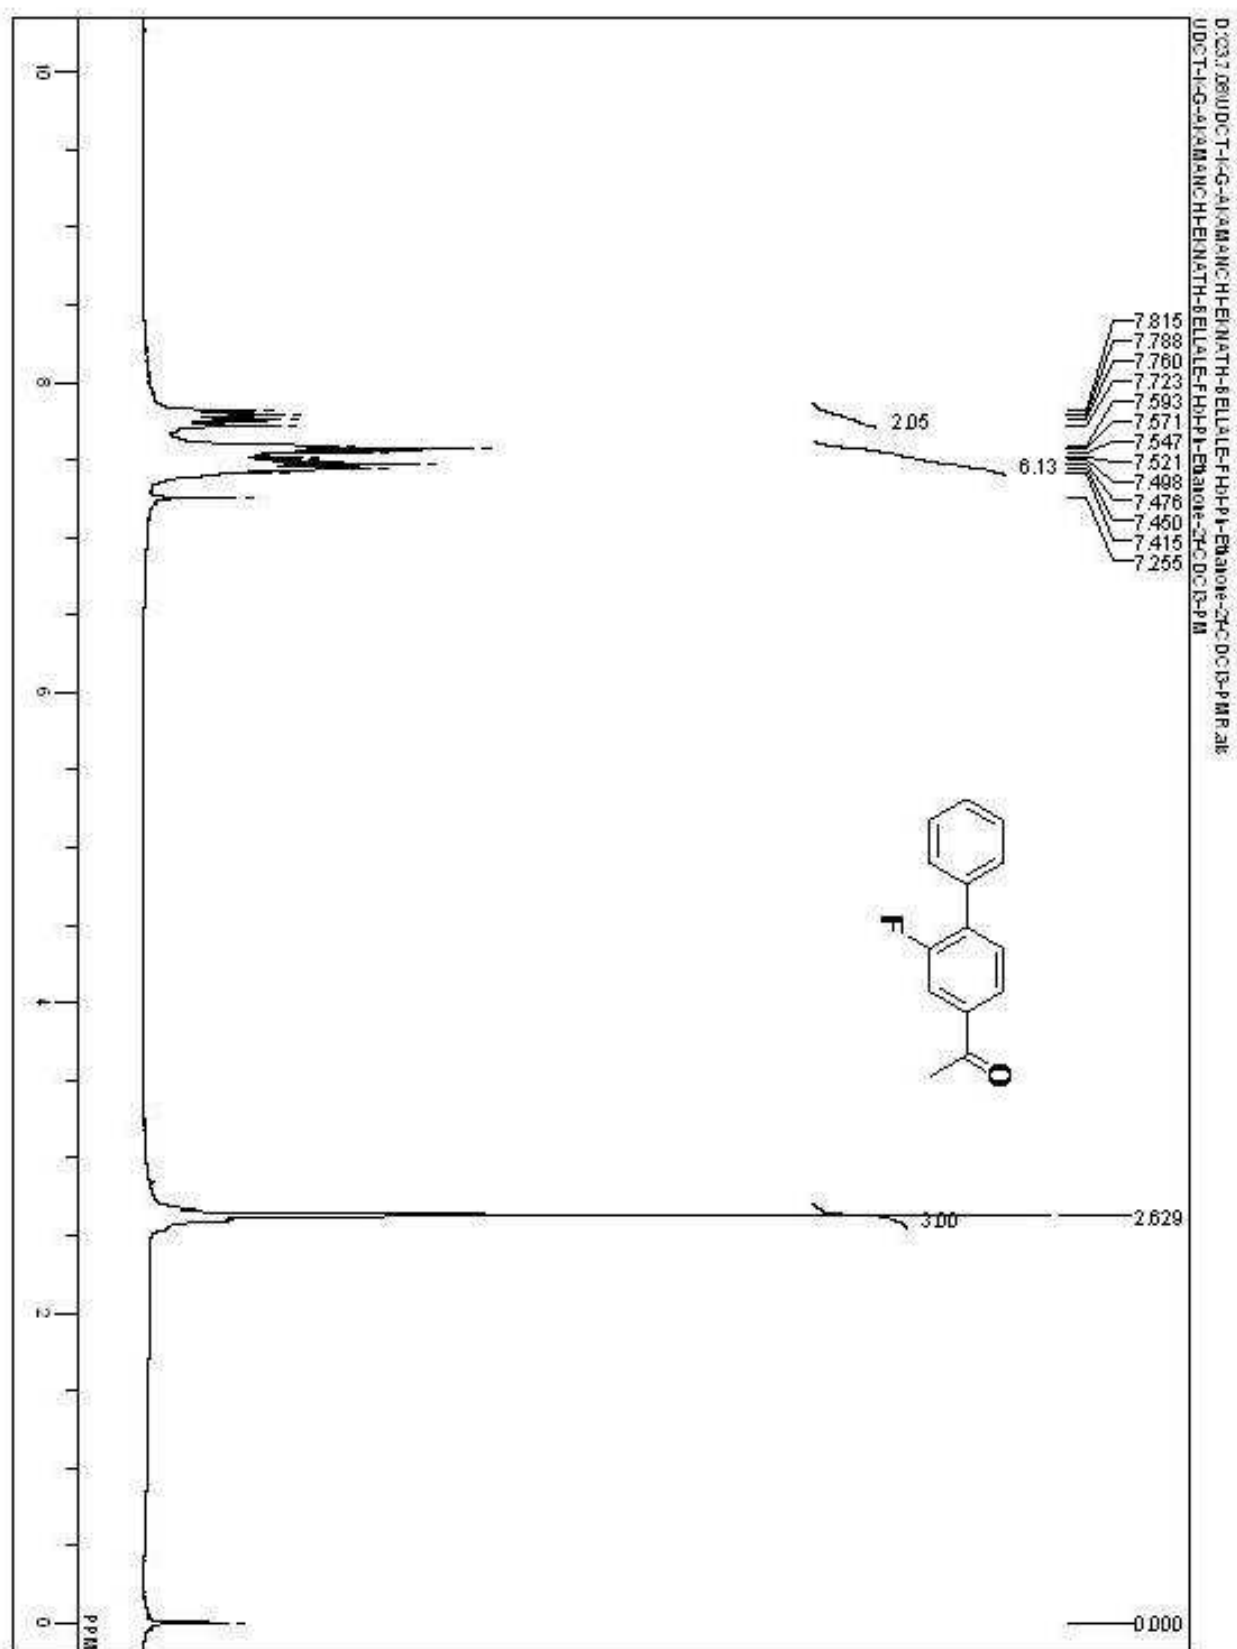

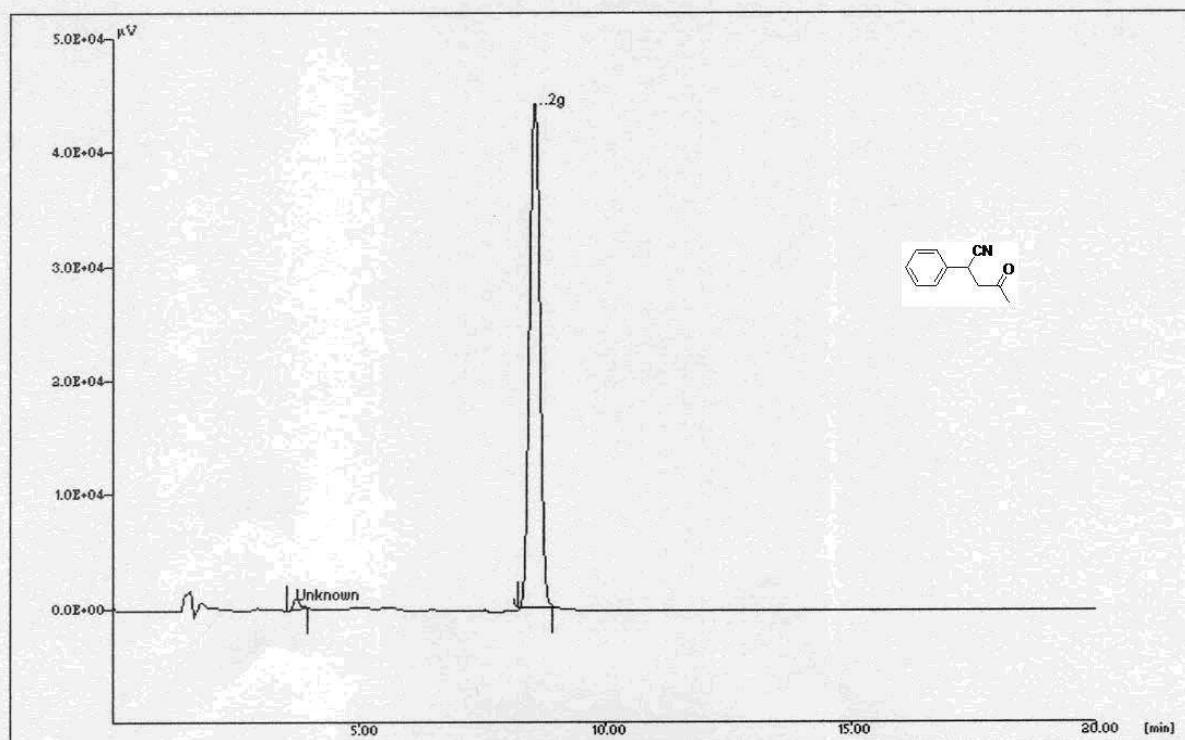

File name : **4-Oxo-2-phenylpentanenitrile 2g**

Info :

SYSTEM : ACN:Water ( 3:1)                      flow : 1 ml/min.

WAVELENGTH : 254

Injection Date :29-Jul-2008 6:04:36

Curr. Date : 29-Jul-2008 9:11:14

User : EKNATH

Group : KGA

Control Method :

| Sr.No. | Name | RT    | Area(μV.Sec) | %Area  |
|--------|------|-------|--------------|--------|
| 1      |      | 3.713 | 7033.975     | 1.259  |
| 2      | 2g   | 8.535 | 551792.581   | 98.741 |

Total Area of Peak = 558826.556 [μV.Sec]

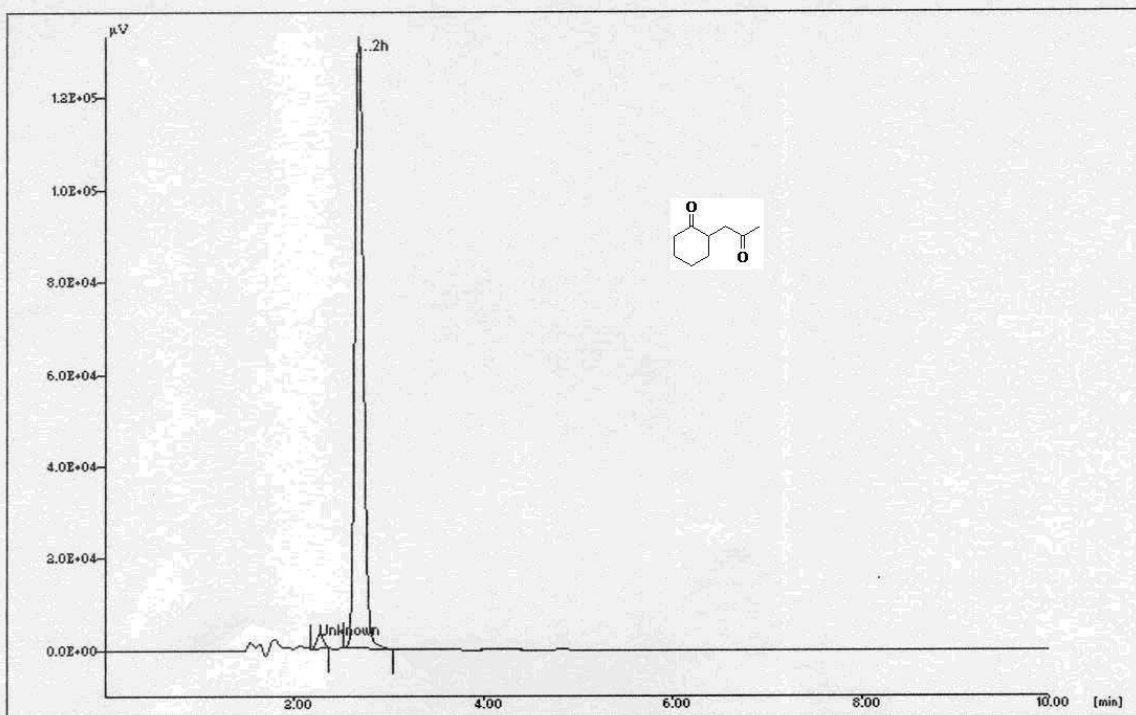

File name : 2-(2-oxopropyl) cyclohexanone 2h

Info :

SYSTEM : ACN:Water ( 3:1) flow : 1 ml/min.

WAVELENGTH : 280

Injection Date :29-Jul-2008 8:19:08

Curr. Date : 29-Jul-2008 9:04:28

User : EKNATH

Group : KGA

Control Method :

| Sr.No. | Name | RT    | Area(μV.Sec) | %Area  |
|--------|------|-------|--------------|--------|
| 1      |      | 2.260 | 13011.187    | 1.832  |
| 2      | 2h   | 2.668 | 697306.113   | 98.168 |

Total Area of Peak = 710317.300 [μV.Sec]

<sup>1</sup>H NMR of Cyclohexanone 2i

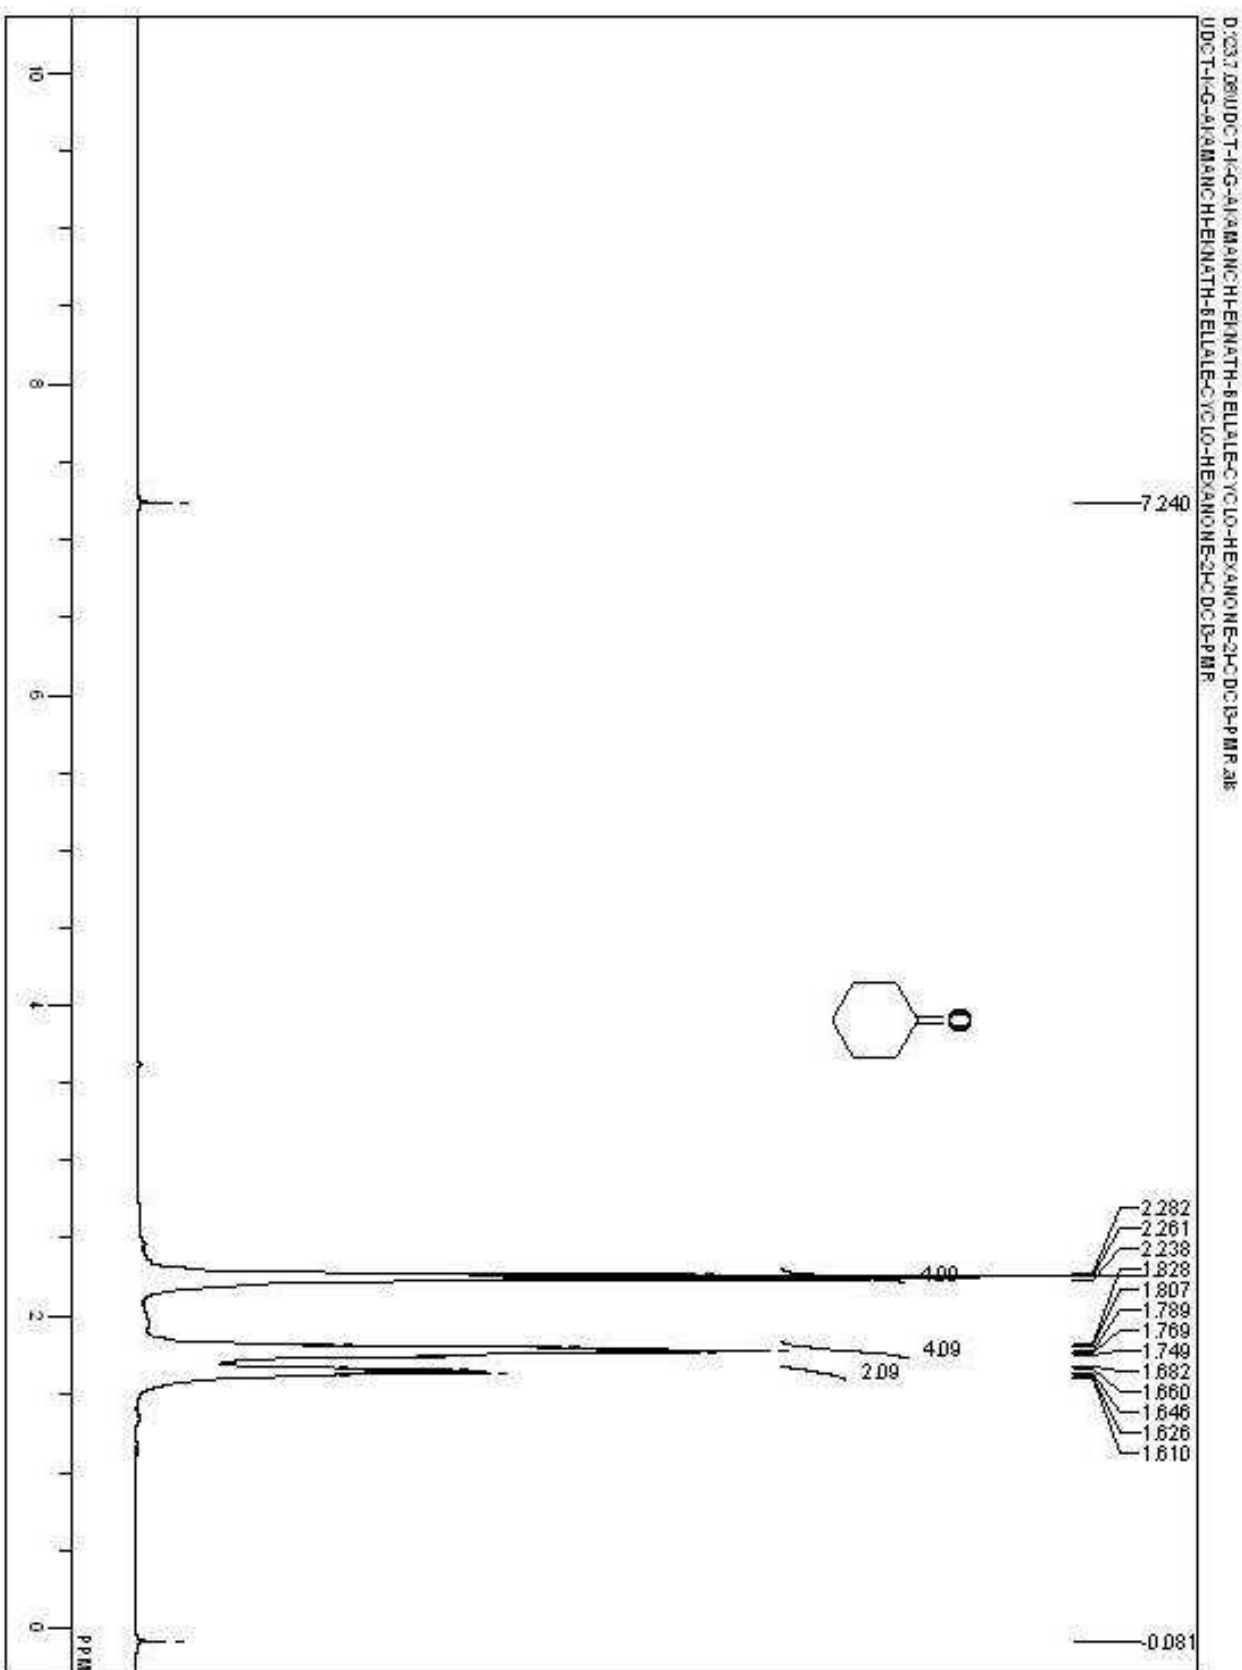

<sup>1</sup>H NMR of 3-Heptanone 2j

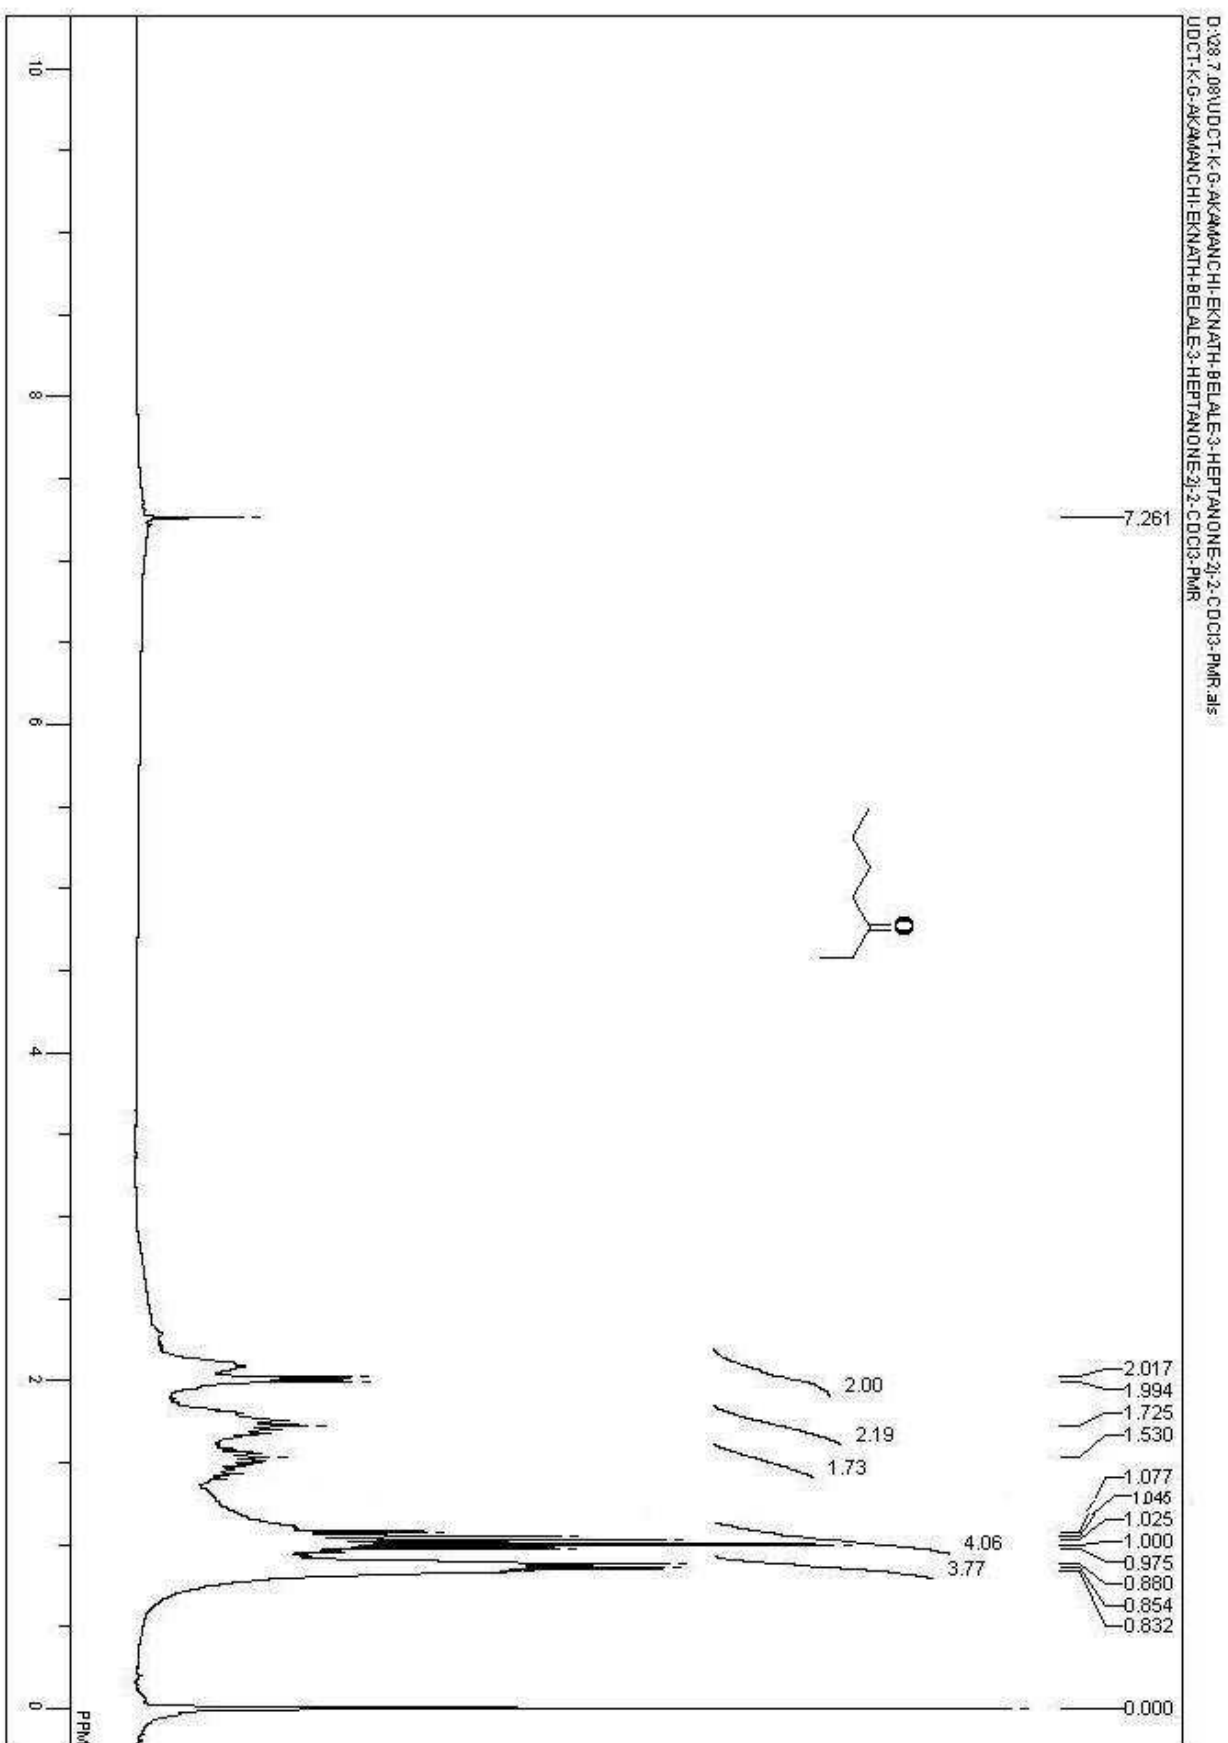

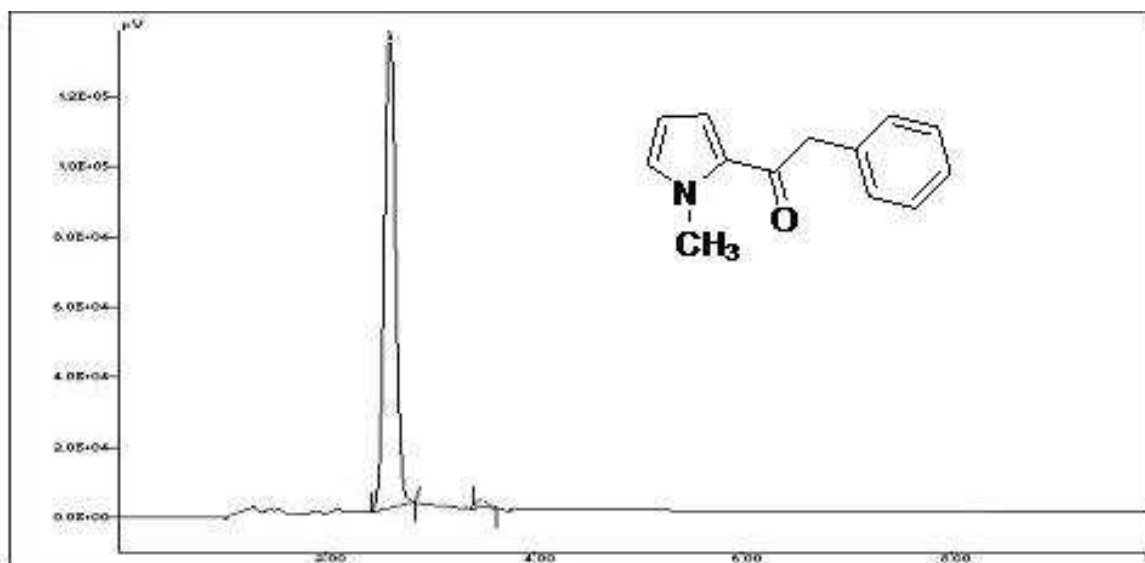

File name : 1-(1-methyl-1H-pyrrol-2-yl)-2-phenylethanone 2k

Info :

SYSTEM : ACN:Water ( 3:1) flow : 1 ml/min.

WAVELENGTH : 254

Injection Date :30-SEP-2008 5:30:36

Curr. Date : 30-SEP-2008 10:11:14

User : EKNATH

Group : KGA

Control Method :

| Sr.No. | Name | RT    | Area(μV.Sec) | %Area  |
|--------|------|-------|--------------|--------|
| 1      | 2k   | 2.602 | 880642.200   | 98.556 |
| 2      |      | 3.480 | 12904.700    | 1.444  |

Total Area of Peak = 893546.900 [μV.Sec]



<sup>1</sup>H NMR of N-Methyl Pyrrolidone 21

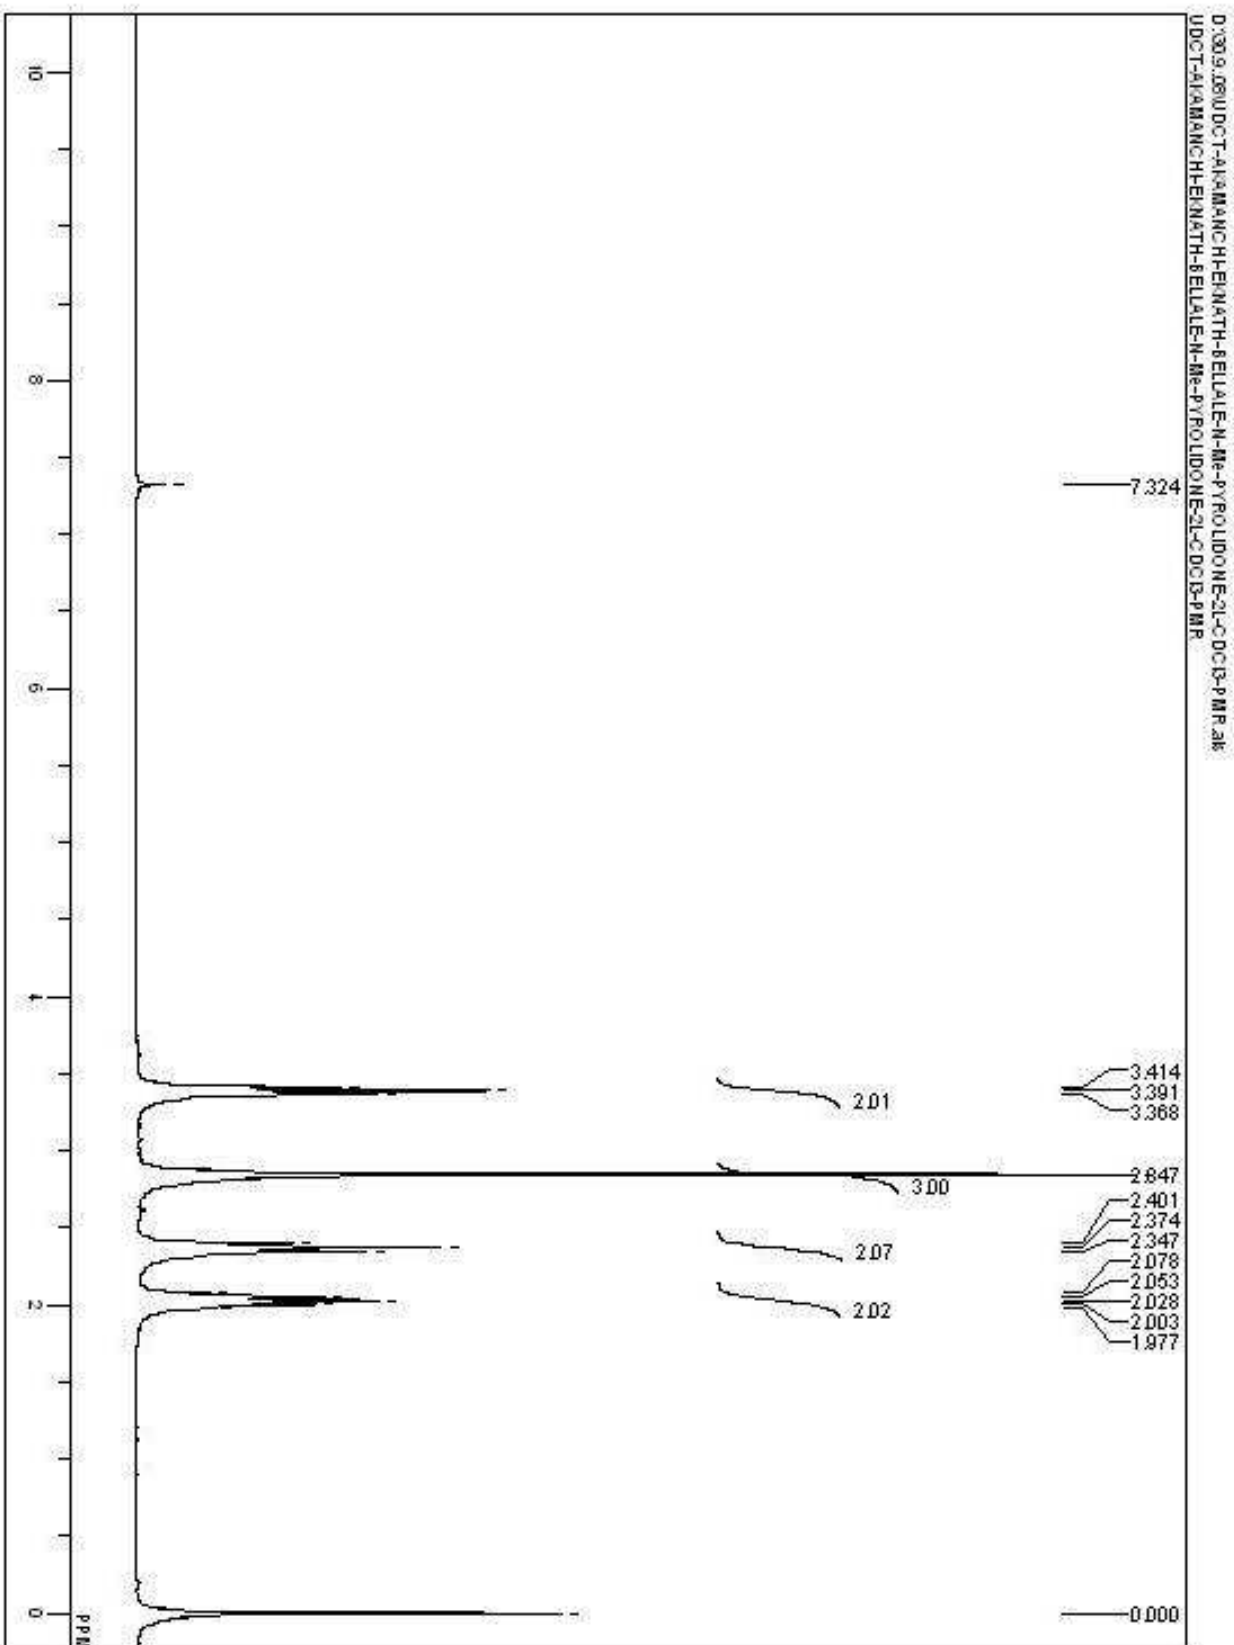

<sup>1</sup>H NMR of N-Bromo-1,1-diphenylmethanimine

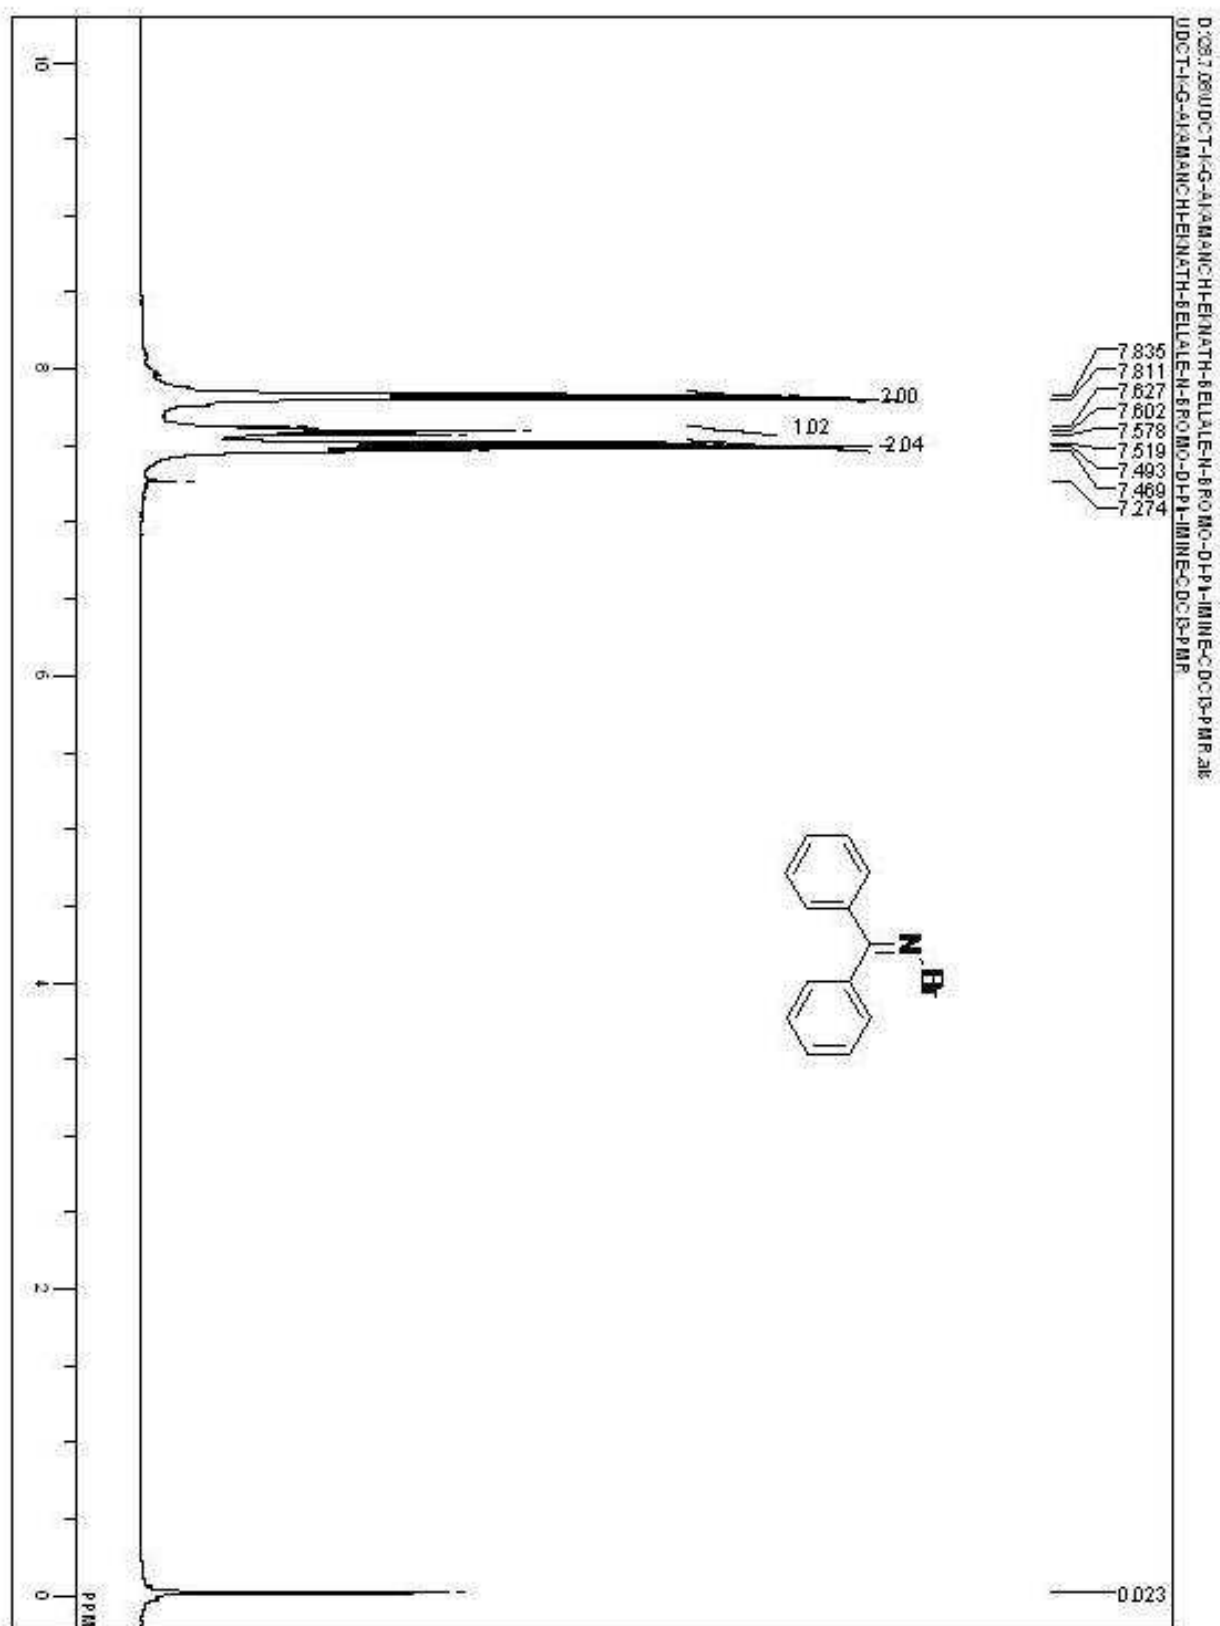

<sup>1</sup>H NMR of Cyclohexanone from Reaction of Isocyanate with IBX/TEAB

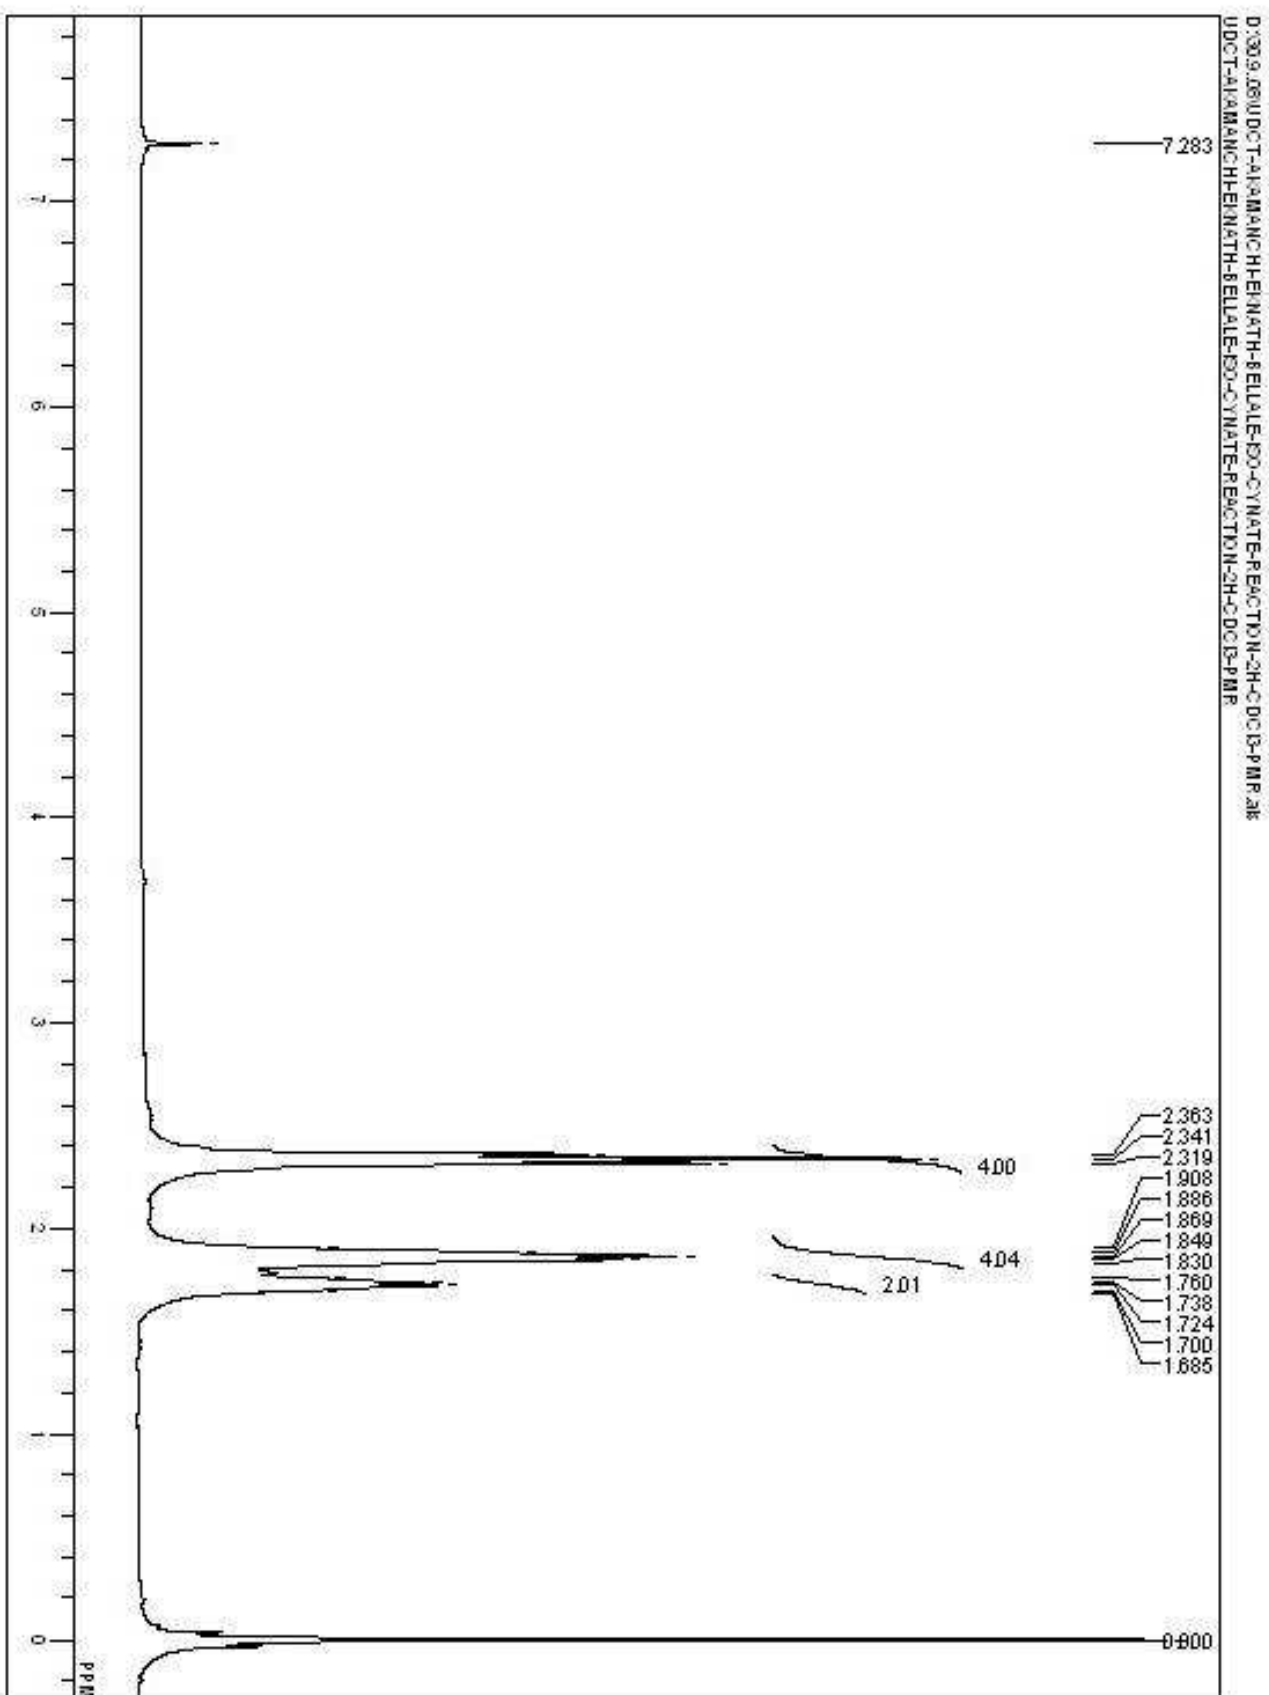

Supplement: Supplementary file 1 [file 4592686]
